# Supplementary material for: Synthesis of (1R,2R)-DPEN-derived triazolium salts and their application in asymmetric intramolecular Stetter reactions
Source: Royal Society of Chemistry journal article supplement (doi:10.1039/c1ob00025j), 2011-01-01
Supplement: c1ob00025j.pdf [file c1ob00025j.pdf]

*Supporting Information for*

**Synthesis of (1*R*,2*R*)-DPEN-Derived Triazolium Salts and Their  
Application in Asymmetric Intramolecular Stetter Reactions**

Min-Qiang Jia, Yi Li, Zi-Qiang Rong, and Shu-Li You\*

State Key Laboratory of Organometallic Chemistry, Shanghai Institute of Organic  
Chemistry, Chinese Academy of Sciences, 345 Lingling Lu, Shanghai 200032  
(China), Fax: (+86) 21-54925087

E-mail: [slyou@sioc.ac.cn](mailto:slyou@sioc.ac.cn)

**Table of Contents**

|                                                |         |
|------------------------------------------------|---------|
| General Methods                                | S2      |
| Experimental Details and Characterization Data | S3-S14  |
| References                                     | S15     |
| NMR Spectra                                    | S17-S47 |

## General Methods.

All reactions utilizing air- or moisture-sensitive reagents were carried out in flame-dried glassware under a dry Ar atmosphere. All solvents were purified and dried according to standard methods prior to use.

<sup>1</sup>H NMR spectra were recorded on a VARIAN Mercury 300 MHz spectrometer in chloroform-d<sub>3</sub>. Chemical shifts are reported in ppm with the internal TMS signal at 0.0 ppm as a standard. The data are reported as (s = singlet, d = doublet, t = triplet, m = multiplet or unresolved, brs = broad singlet, coupling constant (s) in Hz, integration). <sup>13</sup>C NMR spectra were recorded on a VARIAN Mercury 75 MHz spectrometer in chloroform-d<sub>3</sub>. Chemical shifts are reported in ppm with the internal chloroform signal at 77.0 ppm as a standard. <sup>19</sup>F NMR spectra were recorded on a VARIAN Mercury 282 MHz spectrometer. Chemical shifts are reported in ppm with CCl<sub>3</sub>F signal at 0.00 ppm as an external standard.

Optical rotations ( $[\alpha]_D$ ) were measured on a Perkin-Elmer 785A UV/VIS Detector polarimeter. Enantiomeric excesses were determined by HPLC analysis on chiral stationary phases [CHIRALPAK AD-H or CHIRALCEL OD-H or CHIRALCEL OB-H (Daicel Chemical Ind., Ltd.,  $\Phi$  0.46mm  $\times$  25 cm)].

### Preparation of (5*R*,6*R*)-5,6-diphenylpiperazin-2-one **7**<sup>1</sup>

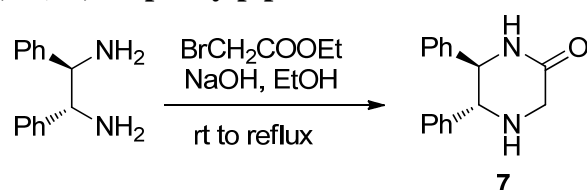

To a solution of (*1R*, *2R*)-1,2-diphenyl-1,2-ethanediamine (2.12 g, 10 mmol) and NaOH 0.4 g (10 mmol) in 30 mL of absolute ethanol was added a solution of ethyl bromoacetate 1.65 g (1.1 mL, 10 mmol) in 20 mL of absolute ethanol over three hours. The reaction was stirred at room temperature for another two days, and then refluxed overnight. After removal of the solvent at reduced pressure, purification by silica gel column chromatography eluting with 5% MeOH in EtOAc afforded title compound **7** as a white solid (1.4 g, 54% yield). <sup>1</sup>H NMR (300 MHz, CDCl<sub>3</sub>) δ 7.11-6.86 (m, 10H), 6.51 (s, 1H), 4.40 (d, *J* = 9.0 Hz, 2H), 3.63 (m, 3H), 2.19 (brs, 1H). <sup>13</sup>C NMR (75 MHz, CDCl<sub>3</sub>) δ 169.7, 138.5, 138.4, 128.28, 128.24, 128.19, 128.10, 127.7, 127.4, 65.8, 64.4, 50.0.

### Preparation of (5*R*,6*R*)-5,6-diphenyl-4-tosylpiperazin-2-one **8**

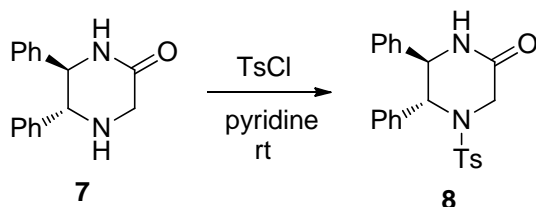

To a solution of compound **7** (1.0 g, 4 mmol) in pyridine (20 mL), *p*-toluenesulfonyl chloride (0.99 g, 5.2 mmol) was added slowly and the mixture was stirred at rt for 24 h. The solution was extracted with Et<sub>2</sub>O and washed with HCl (1N), water and brine. The organic layer was dried over NaSO<sub>4</sub>, filtered, and concentrated under reduced pressure. The crude residue was purified by flash chromatography on silica gel (EtOAc/n-hexane = 1/1) afforded title compound **8** as a white solid (1.4 g, 87% yield).  $[\alpha]_D^{20} = +22.4$  (*c* = 1.0, CH<sub>2</sub>Cl<sub>2</sub>). <sup>1</sup>H NMR (300 MHz, CDCl<sub>3</sub>) δ 6.94-7.31 (m, 14H), 5.30 (s, 1H), 4.88 (s, 1H), 3.80 (dd, *J* = 5.6, 1.8 Hz, 2H), 2.27 (s, 3H). <sup>13</sup>C NMR (75 MHz, CDCl<sub>3</sub>) δ 167.4, 143.5, 139.8, 137.3, 135.2, 129.4, 128.9, 128.3, 128.0, 127.2, 127.1, 126.0, 61.2, 59.1, 45.0, 21.4. IR (thin film):  $\nu_{\max}$  (cm<sup>-1</sup>) = 3431, 3423, 2914,

1685, 1344, 1162, 1096, 1056, 807, 762, 695, 668, 572; MS (ESI,  $m/z$ , rel. intensity) 407.2 (M+H); HRMS (MALDI) calcd for  $C_{23}H_{23}N_2O_3S$  (M+H): 407.1424; Found: 407.1429. m.p. 178-179 °C.

### Preparation of triazolium salts **6a-d**<sup>2</sup>

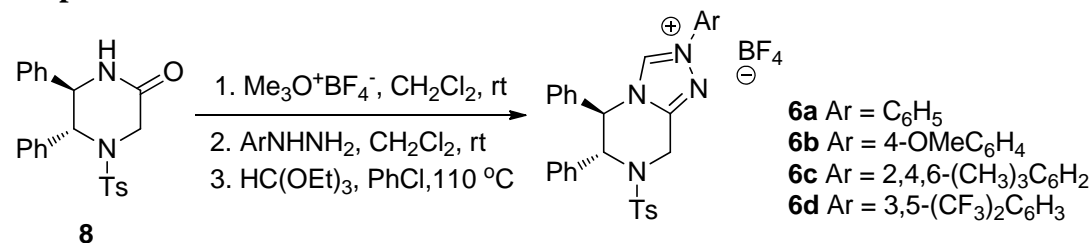

A flamed-dried 50 mL round bottom flask was charged with compound **8** (0.81 g, 2.0 mmol) and  $CH_2Cl_2$  (15 mL). Trimethyloxonium tetrafluoroborate (0.36 g, 2.4 mmol) was added and the mixture was stirred for about 1 day at rt. The corresponding aryl hydrazine (2.4 mmol) was added and stirred for another 1 day. The solvent was evaporated and chlorobenzene (20 mL) was added, followed by triethyl orthoformate (2.5 mL / day, 15 mmol). The mixture was then heated to 110 °C and stirred at this temperature for about 3 d. After completion (monitored by NMR), the solvent was removed under reduced pressure. The crude product was purified by flash column chromatography and further purified by recrystallization in hexane/ethyl acetate. All the yields indicated below refer to those obtained after recrystallization.

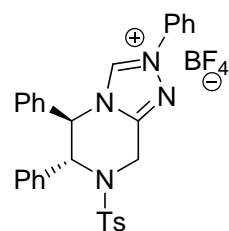

**6a**: White solid, yield 50%.  $[\alpha]_D^{20} = +121.3^\circ$  ( $c = 0.20$ ,  $CHCl_3$ ).  $^1H$  NMR (300 MHz,  $CDCl_3$ )  $\delta$  10.05 (s, 1 H), 7.79 (d,  $J = 17.7$  Hz, 2 H), 7.47-7.24 (m, 13 H), 7.15 (d,  $J = 8.1$  Hz, 2 H), 7.02 (d,  $J = 7.5$  Hz, 2 H), 6.78 (s, 1 H), 5.79 (d,  $J = 1.8$  Hz, 1 H), 5.13 (d,  $J = 17.4$  Hz, 1 H), 4.48 (d,  $J = 17.7$  Hz, 1 H), 2.38 (s, 3 H);  $^{19}F$  NMR (282 MHz,  $CDCl_3$ ):  $\delta$  -150.2, -150.3;  $^{13}C$  NMR (75 MHz,  $CDCl_3$ )  $\delta$  149.3, 144.7, 139.7, 135.2, 134.3, 133.0, 131.4, 130.2, 130.0, 129.7, 129.3, 127.22, 127.17, 126.4, 120.7, 62.1,

61.6, 38.0, 21.5; IR (thin film):  $\nu_{\max}$  ( $\text{cm}^{-1}$ ) = 3064, 2918, 1595, 1455, 1353, 1162, 1055, 760, 689; MS (ESI,  $m/z$ , rel. intensity) 507.1 (M-BF<sub>4</sub>); HRMS (ESI) calcd for C<sub>30</sub>H<sub>27</sub>N<sub>4</sub>O<sub>2</sub>S (M-BF<sub>4</sub>): 507.1849; Found: 507.1851. m.p. 213-216 °C.

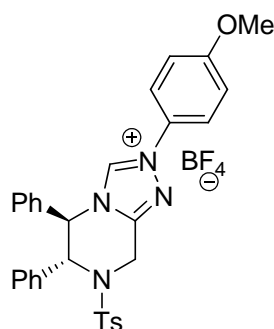

**6b**: Pale yellow solid, yield 27%;  $[\alpha]_{\text{D}}^{20} = +24.3^{\circ}$  ( $c = 0.20$ , CHCl<sub>3</sub>). <sup>1</sup>H NMR (300 MHz, CDCl<sub>3</sub>)  $\delta$  10.00 (s, 1 H), 7.72 (d,  $J = 8.7$  Hz, 2H), 7.36-6.93 (m, 16H), 6.77 (s, 1 H), 5.80 (s, 1 H), 5.09 (d,  $J = 17.4$  Hz, 1 H), 4.46 (d,  $J = 17.4$  Hz, 1 H), 3.80 (s, 3 H), 2.40 (s, 3 H); <sup>19</sup>F NMR (282 MHz, CDCl<sub>3</sub>):  $\delta$  -150.2, -150.3; <sup>13</sup>C NMR (75 MHz, CDCl<sub>3</sub>)  $\delta$  161.6, 148.9, 144.6, 138.9, 135.4, 135.2, 133.0, 130.0, 129.61, 129.58, 129.3, 127.4, 127.2, 126.3, 122.3, 115.2, 61.9, 61.7, 55.7, 37.9, 21.5; IR (thin film):  $\nu_{\max}$  ( $\text{cm}^{-1}$ ) = 3059, 2918, 2842, 1597, 1520, 1454, 1352, 1260, 1162, 1057, 835, 729, 699; MS (ESI,  $m/z$ , rel. intensity) 537.5 (M-BF<sub>4</sub>); HRMS (ESI) calcd for C<sub>31</sub>H<sub>29</sub>N<sub>4</sub>O<sub>3</sub>S (M-BF<sub>4</sub>): 537.1955; Found: 537.1957. m.p. 124-126 °C.

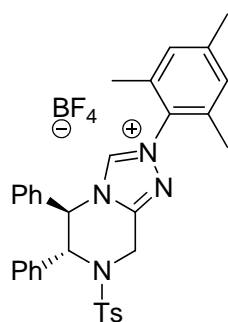

**6c**: White solid, yield 30%;  $[\alpha]_{\text{D}}^{20} = +68.4^{\circ}$  ( $c = 0.20$ , CHCl<sub>3</sub>). <sup>1</sup>H NMR (300 MHz, CDCl<sub>3</sub>)  $\delta$  9.77 (s, 1 H), 7.42-7.31 (m, 10 H), 7.19 (d,  $J = 6.3$  Hz, 2 H), 7.04 (d,  $J = 5.7$  Hz, 2 H), 6.98 (s, 3 H), 5.86 (s, 1 H), 5.10 (d,  $J = 17.4$  Hz, 1 H), 4.53 (d,  $J = 17.4$  Hz, 1 H), 2.43 (s, 3 H), 2.33 (s, 3 H), 1.96 (s, 6 H); <sup>19</sup>F NMR (282 MHz, CDCl<sub>3</sub>):  $\delta$

-150.1, -150.2;  $^{13}\text{C}$  NMR (75 MHz,  $\text{CDCl}_3$ )  $\delta$  149.7, 144.7, 144.4, 142.6, 135.4, 135.2, 133.2, 130.0, 129.8, 129.69, 129.65, 129.3, 127.2, 127.1, 126.1, 62.3, 61.7, 38.1, 21.6, 21.2, 17.0; IR (thin film):  $\nu_{\text{max}}$  ( $\text{cm}^{-1}$ ) = 3065, 2924, 2854, 1651, 1597, 1579, 1500, 1450, 1354, 1267, 1162, 1059, 930, 815, 757, 730, 699; MS (ESI,  $m/z$ , rel. intensity) 549.4 (M-BF<sub>4</sub>); HRMS (ESI) calcd for C<sub>33</sub>H<sub>33</sub>N<sub>4</sub>O<sub>2</sub>S (M-BF<sub>4</sub>): 549.2319; Found: 549.2315. m.p. 221-223 °C.

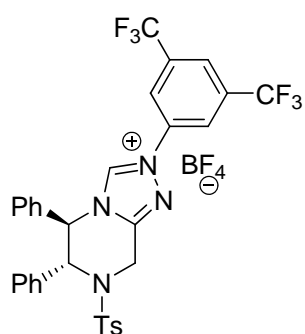

**6d**: White solid, yield 63%;  $[\alpha]_{\text{D}}^{20} = +31.7^\circ$  ( $c = 0.20$ ,  $\text{CHCl}_3$ ).  $^1\text{H}$  NMR (300 MHz,  $\text{CDCl}_3$ )  $\delta$  10.15 (s, 1 H), 8.41 (s, 2 H), 8.00 (s, 1 H), 7.39-7.10 (m, 14 H), 6.59 (d,  $J = 3.3$  Hz, 1 H), 5.79 (d,  $J = 3.3$  Hz, 1 H), 5.13 (d,  $J = 17.7$  Hz, 1 H), 4.53 (d,  $J = 17.7$  Hz, 1 H), 2.39 (s, 3 H);  $^{19}\text{F}$  NMR (282 MHz,  $\text{CDCl}_3$ ):  $\delta$  -63.5, -150.1;  $^{13}\text{C}$  NMR (75 MHz,  $\text{CDCl}_3$ )  $\delta$  150.4, 144.8, 141.5, 135.8, 135.3, 134.3, 134.1, 133.8, 133.1, 130.1, 130.0, 129.8, 129.5, 129.4, 127.5, 127.2, 126.9, 121.95, 121.92, 62.9, 61.6, 38.1, 21.5; IR (thin film):  $\nu_{\text{max}}$  ( $\text{cm}^{-1}$ ) = 3068, 2922, 1596, 1538, 1455, 1367, 1281, 1144, 1074, 898, 814, 756, 698; MS (ESI,  $m/z$ , rel. intensity) 643.2 (M-BF<sub>4</sub>); HRMS (ESI) calcd for C<sub>32</sub>H<sub>25</sub>F<sub>6</sub>N<sub>4</sub>O<sub>2</sub>S (M-BF<sub>4</sub>): 643.1597; Found: 643.1597. m.p. 162-163 °C.

The substrates were prepared according to literatures precedent.<sup>3-6</sup> All spectral data was matched with literature description.

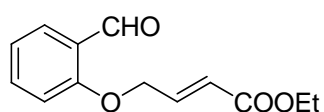

**9a**<sup>5</sup>

White solid.  $^1\text{H}$  NMR (300 MHz,  $\text{CDCl}_3$ )  $\delta$  10.57 (s, 1H), 7.88 (d,  $J = 7.5$  Hz, 1H), 7.56 (dd,  $J = 6.9, 8.7$  Hz, 1H), 7.15-7.06 (m, 2H), 6.95 (d,  $J = 8.4$  Hz, 1H), 6.22 (d,  $J = 15.9$  Hz, 1H), 4.84 (dd,  $J = 2.1, 3.9$  Hz, 2H), 4.23 (q,  $J = 7.2$  Hz, 2H), 1.32 (t,  $J = 7.2$  Hz, 3H).

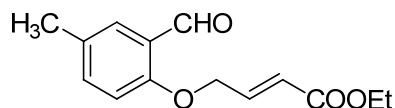

**9b**<sup>5</sup>

White solid.  $^1\text{H}$  NMR (300 MHz,  $\text{CDCl}_3$ )  $\delta$  10.53 (s, 1H), 7.67 (s, 1H), 7.35 (d,  $J = 8.4$  Hz, 1H), 7.10 (dt,  $J = 4.2, 15.6$  Hz, 1H), 6.84 (d,  $J = 8.7$  Hz, 1H), 6.21 (dd,  $J = 2.1, 15.9$  Hz, 2H), 4.81 (dd,  $J = 1.8, 3.6$  Hz, 2H), 4.23 (q,  $J = 7.2$  Hz, 2H), 2.33 (s, 3H), 1.31 (t,  $J = 7.2$  Hz, 3H).

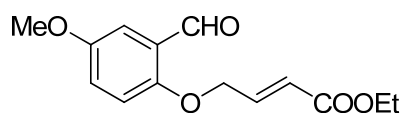

**9c**<sup>5</sup>

White solid.  $^1\text{H}$  NMR (300 MHz,  $\text{CDCl}_3$ )  $\delta$  10.53 (s, 1H), 7.36 (d,  $J = 3.0$  Hz, 1H), 7.12-7.06 (m, 2H), 6.90 (d,  $J = 9.3$  Hz, 1H), 6.20 (dt,  $J = 2.1, 15.6$  Hz, 1H), 4.79 (dd,  $J = 2.1, 3.9$  Hz, 2H), 4.23 (q,  $J = 6.9$  Hz, 2H), 3.82 (s, 3H), 1.31 (t,  $J = 6.9$  Hz, 3H).

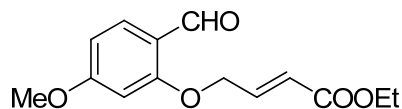

**9d**<sup>5</sup>

Yellow solid.  $^1\text{H}$  NMR (300 MHz,  $\text{CDCl}_3$ )  $\delta$  10.33 (s, 1H), 7.85 (d,  $J = 9.0$  Hz, 1H), 6.68 (dd,  $J = 1.5, 8.7$  Hz, 1H), 6.57 (d,  $J = 5.7$  Hz, 1H), 6.52 (d,  $J = 2.1$  Hz, 1H), 5.25 (dd,  $J = 6.3, 12.9$  Hz, 1H), 4.17 (q,  $J = 7.2$  Hz, 2H), 3.87 (s, 3H), 3.31 (d,  $J = 7.2$  Hz, 2H), 1.28 (t,  $J = 7.2$  Hz, 3H).

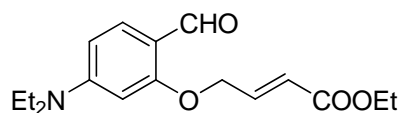

**9e**<sup>5</sup>

Orange solid. <sup>1</sup>H NMR (300 MHz, CDCl<sub>3</sub>) δ 10.22 (s, 1H), 7.73 (d, *J* = 9.0 Hz, 1H), 7.11 (dt, *J* = 3.9, 15.9 Hz, 1H), 6.31 (d, *J* = 10.2 Hz, 1H), 6.25 (d, *J* = 15.9 Hz, 1H), 5.97 (d, *J* = 1.8 Hz, 1H), 4.79 (dd, *J* = 2.1, 6.9 Hz, 2H), 4.22 (q, *J* = 7.2 Hz, 2H), 3.41 (q, *J* = 7.2 Hz, 4H), 1.31 (t, *J* = 7.2 Hz, 3H), 1.21 (t, *J* = 7.2 Hz, 6H).

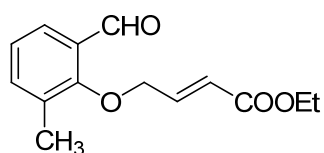

**9f**<sup>5</sup>

White solid. <sup>1</sup>H NMR (300 MHz, CDCl<sub>3</sub>) δ 10.33 (s, 1H), 7.70 (d, *J* = 7.5 Hz, 1H), 7.48 (d, *J* = 7.2 Hz, 1H), 7.19 (t, *J* = 7.5 Hz, 1H), 7.09 (dt, *J* = 4.2, 15.6 Hz, 1H), 6.34 (d, *J* = 15.6 Hz, 1H), 4.62 (dd, *J* = 1.8, 3.9 Hz, 2H), 4.25 (q, *J* = 7.2 Hz, 2H), 2.33 (s, 3H), 1.33 (t, *J* = 7.2 Hz, 3H).

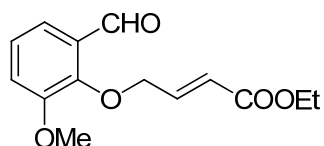

**9g**<sup>5</sup>

White solid. <sup>1</sup>H NMR (300 MHz, CDCl<sub>3</sub>) δ 10.44 (s, 1H), 7.44 (dd, *J* = 4.2, 4.8 Hz, 1H), 7.17 (d, *J* = 4.5 Hz, 2H), 7.09 (dt, *J* = 4.5, 15.9 Hz, 1H), 6.24 (dt, *J* = 1.5, 15.6 Hz, 1H), 4.83 (dd, *J* = 1.5, 4.2 Hz, 2H), 4.23 (q, *J* = 6.9 Hz, 2H), 3.91 (s, 3H), 1.31 (t, *J* = 6.9 Hz, 3H).

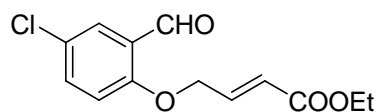

**9h**<sup>5</sup>

White solid. <sup>1</sup>H NMR (300 MHz, CDCl<sub>3</sub>) δ 10.49 (s, 1H), 7.82 (d, *J* = 2.4 Hz, 1H),



7.49 (dd,  $J = 2.4, 9.0$  Hz, 1H), 7.08 (dt,  $J = 4.5, 15.9$  Hz, 1H), 6.91 (d,  $J = 9.0$  Hz, 1H), 6.19 (dt,  $J = 1.8, 15.9$  Hz, 1H), 4.83 (dd,  $J = 1.8, 3.9$  Hz, 2H), 4.23 (q,  $J = 7.2$  Hz, 2H), 1.31 (t,  $J = 7.2$  Hz, 3H).

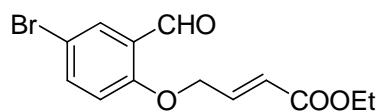

**9i**<sup>5</sup>

White solid. <sup>1</sup>H NMR (300 MHz, CDCl<sub>3</sub>) δ 10.47 (s, 1H), 7.96 (d,  $J = 2.4$  Hz, 1H), 7.63 (dd,  $J = 2.4, 8.7$  Hz, 1H), 7.09 (dt,  $J = 4.5, 15.3$  Hz, 1H), 6.85 (d,  $J = 8.7$  Hz, 1H), 6.19 (d,  $J = 15.6$  Hz, 1H), 4.83 (dd,  $J = 2.1, 4.2$  Hz, 2H), 4.23 (q,  $J = 7.2$  Hz, 2H), 1.32 (t,  $J = 7.2$  Hz, 3H).

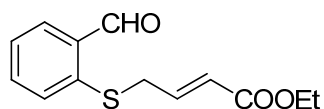

**9j**

Yellow oil. <sup>1</sup>H NMR (300 MHz, CDCl<sub>3</sub>) δ 10.31 (s, 1H), 7.83 (d,  $J = 7.5$  Hz, 1H), 7.52 (t,  $J = 8.1$  Hz, 1H), 7.39-7.31 (m, 2H), 6.97 (dt,  $J = 6.9, 15.6$  Hz, 1H), 5.94 (d,  $J = 15.6$  Hz, 1H), 4.15 (q,  $J = 7.2$  Hz, 2H), 3.70 (d,  $J = 6.6$  Hz, 2H), 1.25 (t,  $J = 7.2$  Hz, 3H). <sup>13</sup>C NMR (75 MHz, CDCl<sub>3</sub>) δ 191.1, 165.3, 141.4, 139.3, 133.8, 133.7, 132.3, 128.3, 125.7, 123.9, 60.2, 33.9, 13.9. IR (thin film):  $\nu_{\max}$  (cm<sup>-1</sup>) = 3061, 2981, 2848, 2742, 1716, 1652, 1587, 1461, 1368, 1317, 1267, 1198, 1041, 978, 754, 679; MS (EI,  $m/z$ , rel. intensity) 250 (M<sup>+</sup>, 2), 137 (100); HRMS (EI) calcd for C<sub>13</sub>H<sub>14</sub>O<sub>3</sub>S (M<sup>+</sup>): 250.0664. Found: 250.0663.

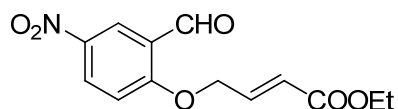

**9k**

White solid. <sup>1</sup>H NMR (400 MHz, CDCl<sub>3</sub>) δ 10.53 (s, 1H), 8.71 (d,  $J = 2.8$  Hz, 1H), 8.43 (dd,  $J = 3.2, 9.2$  Hz, 1H), 7.13 (t,  $J = 4.4$  Hz, 1H), 7.11-7.08 (m, 1H), 6.22 (dt,  $J = 2.0, 16.0$  Hz, 1H), 5.00 (dd,  $J = 2.0, 4.4$  Hz, 2H), 4.25 (q,  $J = 7.2$  Hz, 2H), 1.32 (t,  $J = 7.2$  Hz, 3H).

= 7.2 Hz, 3H).  $^{13}\text{C}$  NMR (100 MHz,  $\text{CDCl}_3$ )  $\delta$  186.9, 165.3, 163.7, 142.0, 139.3, 130.5, 124.9, 124.8, 123.5, 113.1, 67.8, 60.9, 14.1. IR (thin film):  $\nu_{\text{max}}$  ( $\text{cm}^{-1}$ ) = 3080, 2966, 2903, 1694, 1588, 1524, 1368, 1342, 1273, 1193, 1025, 945, 749, 676; MS (EI,  $m/z$ , rel. intensity) 233 (24), 206 (33), 85 (100); HRMS (EI) calcd for  $\text{C}_{13}\text{H}_{13}\text{NO}_6$  ( $\text{M}^+$ ): 279.0743. Found: 279.0747; m.p. 71-73 °C.

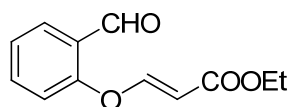

**9l<sup>6</sup>**

Yellow oil.  $^1\text{H}$  NMR (300 MHz,  $\text{CDCl}_3$ )  $\delta$  10.37 (s, 1H), 7.93 (dd,  $J$  = 1.8, 7.8 Hz, 1H), 7.85 (d,  $J$  = 12.3 Hz, 1H), 7.69-7.63 (m, 1H), 7.33 (t,  $J$  = 7.5 Hz, 1H), 7.17 (d,  $J$  = 8.7 Hz, 1H), 5.64 (d,  $J$  = 12.0 Hz, 1H), 4.22 (q,  $J$  = 7.2 Hz, 2H), 1.30 (t,  $J$  = 7.2 Hz, 3H).

#### General Procedure for Enantioselective Intramolecular Stetter Reactions:

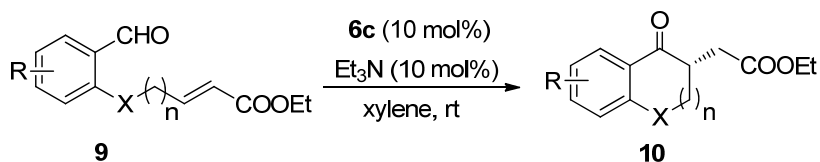

A flame dried Schlenk tube was cooled to room temperature and filled with argon. To this tube were added triazolium salt **6c** (6.4 mg, 0.01 mmol, 10 mol%) and xylene (1.0 mL). Then to this solution was added  $\text{Et}_3\text{N}$  (1.4  $\mu\text{L}$ , 0.01 mmol, 10 mol%), the solution was stirred at room temperature for 30 minutes. The substrate **9** (0.1 mmol) was then added. After the reaction was complete (monitored by TLC), the reaction mixture was cooled to 0 °C immediately, quenched with 5 mL  $\text{H}_2\text{O}$ , The organic layer was separated, and the aqueous layer was extracted three times with ethyl acetate. The combined organic layers were dried over  $\text{Na}_2\text{SO}_4$ , filtered, and concentrated. The residue was purified by silica gel column chromatography ( $n$ -Hexane/ $\text{EtOAc}$  = 10/1) to afford the product **10**.

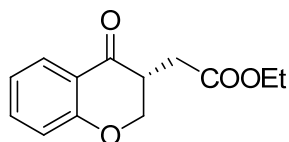**10a<sup>5</sup>**

Colorless oil, 95% yield, 93% ee [Daicel Chiralpak AD-H, hexane/2-propanol = 97/3,  $\nu = 0.7 \text{ mL} \cdot \text{min}^{-1}$ ,  $\lambda = 254 \text{ nm}$ ,  $t$  (major) = 23.1 min,  $t$  (minor) = 34.9 min];  $[\alpha]_{\text{D}}^{20} = -6.8$  ( $c = 1.0$ ,  $\text{CH}_2\text{Cl}_2$ ).  $^1\text{H NMR}$  (300 MHz,  $\text{CDCl}_3$ )  $\delta$  7.89 (dd,  $J = 1.8, 7.8 \text{ Hz}$ , 1H), 7.51-7.45 (m, 1H), 7.05-6.96 (m, 2H), 4.60 (dd,  $J = 5.4, 11.1 \text{ Hz}$ , 1H), 4.30 (t,  $J = 11.7 \text{ Hz}$ , 1H), 4.19 (q,  $J = 7.2 \text{ Hz}$ , 2H), 3.39-3.29 (m, 1H), 2.94 (dd,  $J = 4.8, 17.1 \text{ Hz}$ , 1H), 2.42 (dd,  $J = 8.1, 17.1 \text{ Hz}$ , 1H), 1.28 (t,  $J = 7.2 \text{ Hz}$ , 3H).

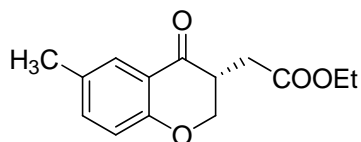**10b<sup>5</sup>**

Colorless oil, 98% yield, 95% ee [Daicel Chiralpak AD-H, hexane/2-propanol = 95/5,  $\nu = 1.0 \text{ mL} \cdot \text{min}^{-1}$ ,  $\lambda = 254 \text{ nm}$ ,  $t$  (major) = 13.4 min,  $t$  (minor) = 20.8 min];  $[\alpha]_{\text{D}}^{20} = -20.5$  ( $c = 1.0$ ,  $\text{CH}_2\text{Cl}_2$ ).  $^1\text{H NMR}$  (300 MHz,  $\text{CDCl}_3$ )  $\delta$  7.67 (s,  $J = 1\text{H}$ ), 7.28 (d,  $J = 8.1 \text{ Hz}$ , 1H), 6.87 (d,  $J = 8.4 \text{ Hz}$ , 1H), 4.57 (dd,  $J = 5.1, 11.1 \text{ Hz}$ , 1H), 4.17-4.26 (m, 3H), 3.35-3.25 (m, 1H), 2.92 (dd,  $J = 4.8, 16.8 \text{ Hz}$ , 1H), 2.41 (dd,  $J = 8.7, 17.1 \text{ Hz}$ , 1H), 2.30 (s, 3H), 1.28 (t,  $J = 7.2 \text{ Hz}$ , 3H).

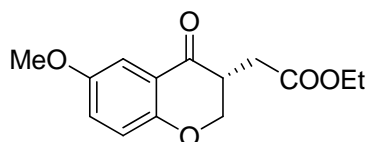**10c<sup>5</sup>**

Yellow oil, 95% yield, 88% ee [Daicel Chiralpak AD-H, hexane/2-propanol = 95/5,  $\nu = 1.0 \text{ mL} \cdot \text{min}^{-1}$ ,  $\lambda = 254 \text{ nm}$ ,  $t$  (major) = 19.9 min,  $t$  (minor) = 28.6 min];  $[\alpha]_{\text{D}}^{20} = -24.2$  ( $c = 1.0$ ,  $\text{CHCl}_3$ ).  $^1\text{H NMR}$  (300 MHz,  $\text{CDCl}_3$ )  $\delta$  7.31 (d,  $J = 3.0 \text{ Hz}$ , 1H), 7.08 (dd, 3.3, 9.0 Hz, 1H), 6.91 (d,  $J = 9.0 \text{ Hz}$ , 1H), 4.56 (dd,  $J = 5.1, 11.1 \text{ Hz}$ , 1H),

4.30-4.16 (m, 3H), 3.77 (s, 3H), 3.36-3.26 (m, 1H), 2.90 (dd,  $J = 4.5, 16.8$  Hz, 1H), 2.43 (dd,  $J = 8.1, 17.1$  Hz, 1H), 1.27 (t,  $J = 7.2$  Hz, 3H).

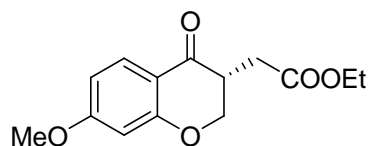

**10d<sup>5</sup>**

Yellow oil, 87% yield, 97% ee [Daicel Chiralpak AD-H, hexane/2-propanol = 95/5,  $\nu = 1.0$  mL · min<sup>-1</sup>,  $\lambda = 254$  nm, t (major) = 21.4 min, t (minor) = 27.5 min];  $[\alpha]_D^{20} = -10.8$  (c = 1.0, CHCl<sub>3</sub>). <sup>1</sup>H NMR (300 MHz, CDCl<sub>3</sub>)  $\delta$  7.82 (d,  $J = 8.7$  Hz, 1H), 6.59 (dd,  $J = 2.4, 8.7$  Hz, 1H), 6.41 (d,  $J = 2.4$  Hz, 1H), 4.59 (dd,  $J = 5.4, 11.1$  Hz, 1H), 4.28 (t,  $J = 11.4$  Hz, 1H), 4.19 (q,  $J = 7.2$  Hz, 2H), 3.83 (s, 3H), 3.31-3.24 (m, 1H), 2.94 (dd,  $J = 4.8, 17.1$  Hz, 1H), 2.39 (dd,  $J = 8.4, 16.8$  Hz, 1H), 1.29 (t,  $J = 7.2$  Hz, 3H).

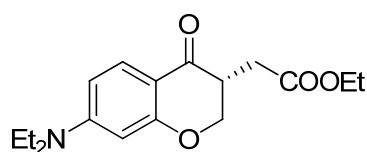

**10e<sup>5</sup>**

Yellow oil, 56% yield, 95% ee [Daicel Chiralpak AD-H, hexane/2-propanol = 90/10,  $\nu = 1.0$  mL · min<sup>-1</sup>,  $\lambda = 254$  nm, t (major) = 18.9 min, t (minor) = 20.7 min];  $[\alpha]_D^{20} = +9.5$  (c = 1.0, CHCl<sub>3</sub>). <sup>1</sup>H NMR (300 MHz, CDCl<sub>3</sub>)  $\delta$  7.74 (d,  $J = 9.0$  Hz, 1H), 6.34 (dd,  $J = 2.4, 9.0$  Hz, 1H), 6.04 (d,  $J = 2.4$  Hz, 1H), 4.52 (dd,  $J = 5.1, 11.1$  Hz, 1H), 4.26-4.14 (m, 3H), 3.38 (q,  $J = 7.2$  Hz, 4H), 3.23-3.15 (m, 1H), 2.95 (dd,  $J = 4.8, 17.1$  Hz, 1H), 2.35 (dd,  $J = 8.7, 16.8$  Hz, 1H), 1.28 (t,  $J = 7.2$  Hz, 3H), 1.20 (t,  $J = 7.2$  Hz, 6H).

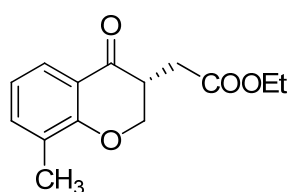

**10f<sup>5</sup>**

Yellow oil, 98% yield, 80% ee [Daicel Chiralpak AD-H, hexane/2-propanol = 97/3,  $\nu = 0.7 \text{ mL} \cdot \text{min}^{-1}$ ,  $\lambda = 254 \text{ nm}$ ,  $t$  (major) = 17.9 min,  $t$  (minor) = 24.0 min];  $[\alpha]_{\text{D}}^{20} = -11.2$  ( $c = 1.0$ ,  $\text{CH}_2\text{Cl}_2$ ).  $^1\text{H NMR}$  (300 MHz,  $\text{CDCl}_3$ )  $\delta$  7.74 (d,  $J = 7.5 \text{ Hz}$ , 1H), 7.34 (d,  $J = 7.2 \text{ Hz}$ , 1H), 6.92 (t,  $J = 7.5 \text{ Hz}$ , 1H), 4.64 (dd,  $J = 5.4, 10.8 \text{ Hz}$ , 1H), 4.29 (t,  $J = 12.0 \text{ Hz}$ , 1H), 4.19 (q,  $J = 7.2 \text{ Hz}$ , 2H), 3.35-3.28 (m, 1H), 2.94 (dd,  $J = 4.5, 17.1 \text{ Hz}$ , 1H), 2.40 (dd,  $J = 8.1, 16.8 \text{ Hz}$ , 1H), 2.24 (s, 3H), 1.29 (t,  $J = 7.2 \text{ Hz}$ , 3H).

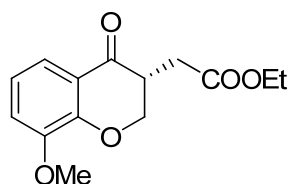**10g<sup>5</sup>**

Yellow oil, 98% yield, 81% ee [Daicel Chiralpak AD-H, hexane/2-propanol = 90/10,  $\nu = 1.0 \text{ mL} \cdot \text{min}^{-1}$ ,  $\lambda = 254 \text{ nm}$ ,  $t$  (major) = 16.2 min,  $t$  (minor) = 22.1 min];  $[\alpha]_{\text{D}}^{20} = -26.1$  ( $c = 1.0$ ,  $\text{CH}_2\text{Cl}_2$ ).  $^1\text{H NMR}$  (300 MHz,  $\text{CDCl}_3$ )  $\delta$  7.47 (dd,  $J = 1.5, 7.8 \text{ Hz}$ , 1H), 7.04 (dd,  $J = 1.5, 7.8 \text{ Hz}$ , 1H), 6.95 (t,  $J = 8.1 \text{ Hz}$ , 1H), 4.69 (dd,  $J = 5.4, 11.4 \text{ Hz}$ , 1H), 4.35 (t,  $J = 11.1 \text{ Hz}$ , 1H), 4.16 (q,  $J = 7.2 \text{ Hz}$ , 2H), 3.89 (s, 3H), 3.38-3.28 (m, 1H), 2.91 (dd,  $J = 4.8, 17.1 \text{ Hz}$ , 1H), 2.45 (dd,  $J = 8.7, 16.8 \text{ Hz}$ , 1H), 1.28 (t,  $J = 7.2 \text{ Hz}$ , 3H).

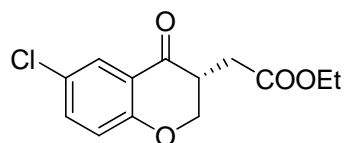**10h<sup>5</sup>**

Yellow oil, 98% yield, 78% ee [Daicel Chiralpak AD-H, hexane/2-propanol = 95/5,  $\nu = 1.0 \text{ mL} \cdot \text{min}^{-1}$ ,  $\lambda = 254 \text{ nm}$ ,  $t$  (major) = 14.8 min,  $t$  (minor) = 21.6 min];  $[\alpha]_{\text{D}}^{20} = -13.7$  ( $c = 1.1$ ,  $\text{CHCl}_3$ ).  $^1\text{H NMR}$  (300 MHz,  $\text{CDCl}_3$ )  $\delta$  7.83 (d,  $J = 2.7 \text{ Hz}$ , 1H), 7.39-7.43 (m, 1H), 6.94 (d,  $J = 9.0 \text{ Hz}$ , 1H), 4.61 (dd,  $J = 5.4, 11.4 \text{ Hz}$ , 1H), 4.30 (t,  $J = 11.7 \text{ Hz}$ , 1H), 4.19 (q,  $J = 7.2 \text{ Hz}$ , 2H), 3.36-3.26 (m, 1H), 2.92 (dd,  $J = 4.8, 17.1 \text{ Hz}$ , 1H), 2.43 (dd,  $J = 8.1, 17.4 \text{ Hz}$ , 1H), 1.28 (t,  $J = 7.2 \text{ Hz}$ , 3H).

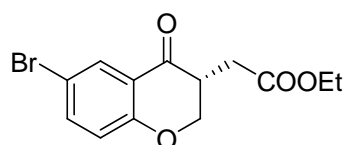

### 10i<sup>5</sup>

Yellow oil, 93% yield, 78% ee [Daicel Chiralcel OD-H, hexane/2-propanol = 97/3,  $\nu$  = 0.5 mL · min<sup>-1</sup>,  $\lambda$  = 254 nm, t (minor) = 29.1 min, t (major) = 32.1 min];  $[\alpha]_D^{20}$  = -12.9 (c = 1.0, CHCl<sub>3</sub>). <sup>1</sup>H NMR (400 MHz, CDCl<sub>3</sub>)  $\delta$  7.98 (d,  $J$  = 2.1 Hz, 1H), 7.54 (dd,  $J$  = 2.7, 9.0 Hz, 1H), 6.88 (d,  $J$  = 8.7 Hz, 1H), 4.60 (dd,  $J$  = 5.4, 11.1 Hz, 1H), 4.29 (t,  $J$  = 11.4 Hz, 1H), 4.18 (q,  $J$  = 7.2 Hz, 2H), 3.36-3.26 (m, 1H), 2.91 (dd,  $J$  = 4.5, 17.1 Hz, 1H), 2.43 (dd,  $J$  = 8.1, 17.1 Hz, 1H), 1.26 (t,  $J$  = 7.2 Hz, 3H).

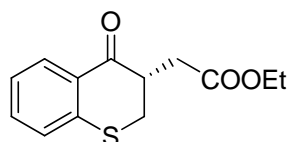

### 10j

Yellow oil, 70% yield, 89% ee [Daicel Chiralpak AD-H, hexane/2-propanol = 97/3,  $\nu$  = 0.7 mL · min<sup>-1</sup>,  $\lambda$  = 254 nm, t (major) = 21.0 min, t (minor) = 25.6 min];  $[\alpha]_D^{20}$  = -62.2 (c = 1.0, CH<sub>2</sub>Cl<sub>2</sub>). <sup>1</sup>H NMR (300 MHz, CDCl<sub>3</sub>)  $\delta$  8.09 (d,  $J$  = 8.1 Hz, 1H), 7.37 (t,  $J$  = 7.2 Hz, 1H), 7.26 (d,  $J$  = 6.6 Hz, 1H), 7.20 (t,  $J$  = 7.5 Hz, 1H), 4.19 (q,  $J$  = 7.2 Hz, 2H), 3.37-3.34 (m, 2H), 3.13-3.10 (m, 1H), 2.98 (dd,  $J$  = 5.1, 16.8 Hz, 1H), 2.60 (dd,  $J$  = 6.9, 16.8 Hz, 1H), 1.29 (t,  $J$  = 7.2 Hz, 3H). <sup>13</sup>C NMR (75 MHz, CDCl<sub>3</sub>)  $\delta$  194.5, 171.6, 141.7, 133.2, 130.3, 129.6, 127.3, 124.9, 60.8, 44.4, 34.3, 30.8, 14.1. IR (thin film):  $\nu_{\max}$  (cm<sup>-1</sup>) = 2980, 1732, 1681, 1588, 1437, 1177, 1028, 765, 737; MS (EI,  $m/z$ , rel. intensity) 250 (M<sup>+</sup>, 5), 163 (100); HRMS (EI) calcd for C<sub>13</sub>H<sub>14</sub>O<sub>3</sub>S (M<sup>+</sup>): 250.0664. Found: 250.0662.

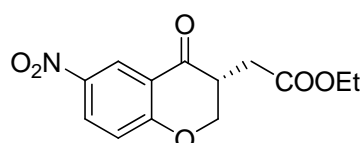

### 10k

White solid, 90% yield, 0% ee [Daicel Chiralpak AD-H, hexane/2-propanol = 70/30,  $\nu = 1.0 \text{ mL} \cdot \text{min}^{-1}$ ,  $\lambda = 254 \text{ nm}$ ,  $t$  (major) = 12.7 min,  $t$  (minor) = 20.3 min].  $^1\text{H}$  NMR (300 MHz,  $\text{CDCl}_3$ )  $\delta$  8.78 (d,  $J = 2.7 \text{ Hz}$ , 1H), 8.34 (dd,  $J = 2.7, 9.0 \text{ Hz}$ , 1H), 7.13 (d,  $J = 9.0 \text{ Hz}$ , 1H), 4.76 (dd,  $J = 5.4, 11.4 \text{ Hz}$ , 1H), 4.44 (t,  $J = 11.7 \text{ Hz}$ , 1H), 4.20 (q,  $J = 7.2 \text{ Hz}$ , 1H), 3.45-3.35 (m, 1H), 2.96 (dd,  $J = 4.8, 17.1 \text{ Hz}$ , 1H), 2.51 (dd,  $J = 7.5, 17.1 \text{ Hz}$ , 1H), 1.30 (t,  $J = 7.2 \text{ Hz}$ , 1H).  $^{13}\text{C}$  NMR (75 MHz,  $\text{CDCl}_3$ )  $\delta$  190.6, 170.8, 165.6, 142.1, 130.3, 123.9, 120.0, 119.2, 70.6, 61.2, 42.1, 29.8, 14.1. IR (thin film):  $\nu_{\text{max}} (\text{cm}^{-1}) = 2986, 1731, 1692, 1439, 1339, 1012, 856, 750, 622$ ; MS (EI,  $m/z$ , rel. intensity) 279 ( $\text{M}^+$ , 1), 192 (100); HRMS (EI) calcd for  $\text{C}_{13}\text{H}_{13}\text{NO}_6$  ( $\text{M}^+$ ): 279.0743. Found: 279.0745; m.p. 86-88 °C.

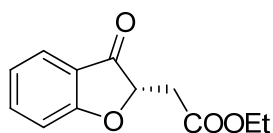

### 10l

Yellow oil, 59% yield, 0% ee [Daicel Chiralcel OB-H, hexane/2-propanol = 90/10,  $\nu = 1.0 \text{ mL} \cdot \text{min}^{-1}$ ,  $\lambda = 254 \text{ nm}$ ,  $t$  (minor) = 21.3 min,  $t$  (major) = 37.9 min].  $^1\text{H}$  NMR (300 MHz,  $\text{CDCl}_3$ )  $\delta$  7.69 (d,  $J = 7.5 \text{ Hz}$ , 1H), 7.62 (t,  $J = 7.5 \text{ Hz}$ , 1H), 7.15-7.08 (m, 2H), 4.89 (dd,  $J = 3.9, 7.5 \text{ Hz}$ , 1H), 4.18-4.11 (m, 2H), 3.09 (dd,  $J = 3.6, 17.1 \text{ Hz}$ , 1H), 2.83 (dd,  $J = 7.5, 16.8 \text{ Hz}$ , 1H), 1.20 (t,  $J = 7.2 \text{ Hz}$ , 3H).  $^{13}\text{C}$  NMR (75 MHz,  $\text{CDCl}_3$ )  $\delta$  200.4, 172.4, 169.3, 138.0, 124.2, 122.1, 120.9, 113.5, 81.0, 61.2, 36.0, 13.9. IR (thin film):  $\nu_{\text{max}} (\text{cm}^{-1}) = 2983, 2935, 1724, 1615, 1464, 1327, 1191, 1026, 891, 760$ ; MS (EI,  $m/z$ , rel. intensity) 220 ( $\text{M}^+$ , 28), 147 (100); HRMS (EI) calcd for  $\text{C}_{12}\text{H}_{12}\text{O}_4$  ( $\text{M}^+$ ): 220.0736. Found: 220.0739.

### References

- [1] (a) L. Darko and J. Karliker, *J. Org. Chem.*, 1971, **36**, 3810. (b) R. R.R. Taylor, H. C. Twin and R. A. Batey et al., *Tetrahedron*, 2010, **66**, 3370.
- [2] (a) Y. Li, Z. Feng and S.-L. You, *Chem. Commun.*, 2008, 2263. (b) M. S. Kerr, J. Read de Alaniz and T. Rovis, *J. Org. Chem.*, 2005, **70**, 5725.
- [3] E. Ciganek, *Synthesis*, 1995, **5**, 1311.
- [4] X. Han, L.-W. Ye, X.-L. Sun and Y. Tang, *J. Org. Chem.*, 2009, **74**, 3394.

- [5] J. Read de Alaniz, M. S. Kerr, J. L. Moore and T. Rovis, *J. Org. Chem.*, 2008, **73**, 2033.
- [6] S.-L. Cui, J. Wang, X.-F. Lin and Y.-G. Wang, *J. Org. Chem.*, 2007, **72**, 7779.



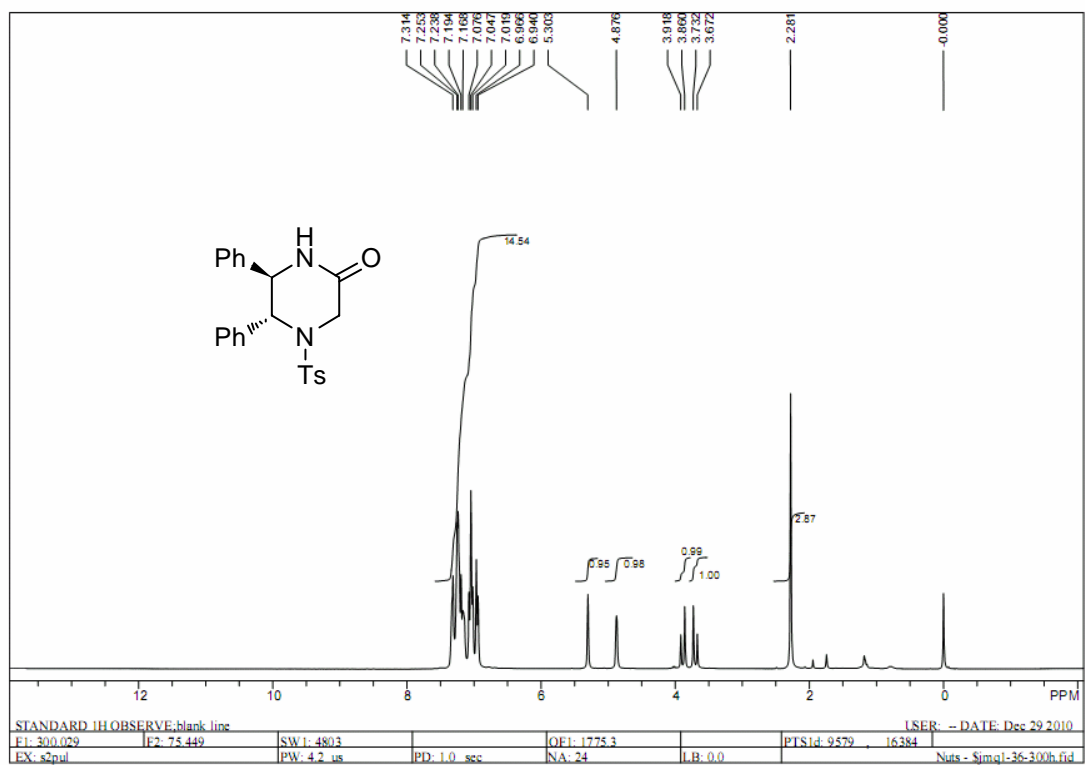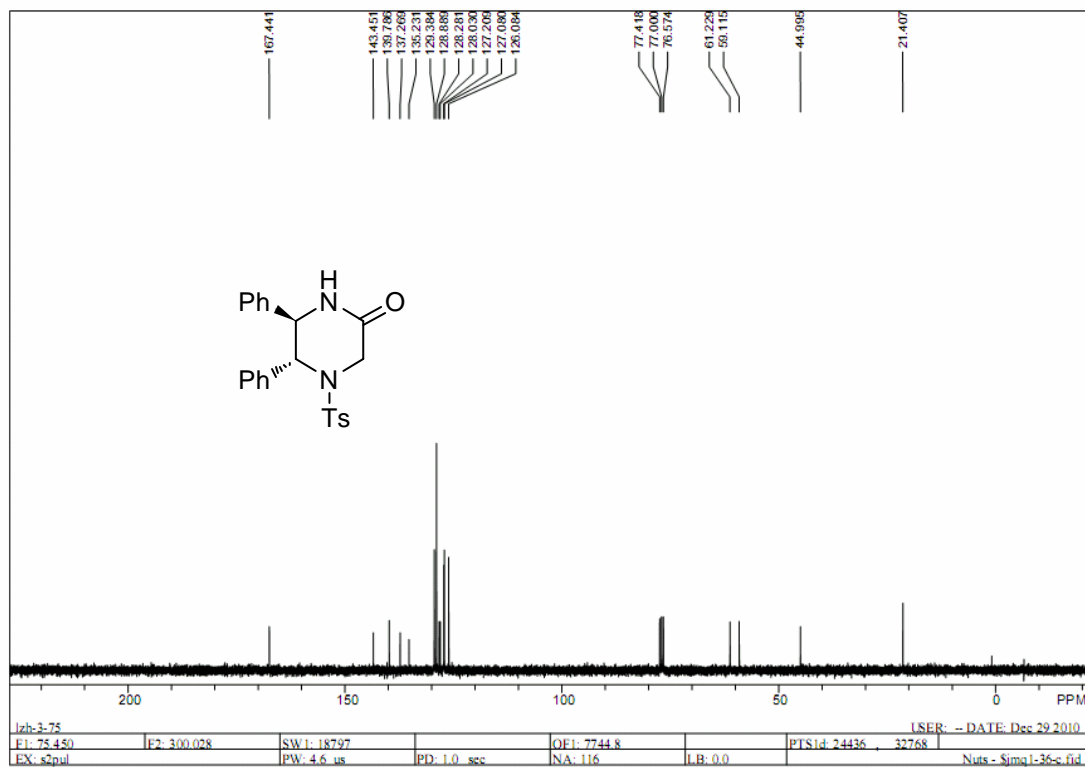

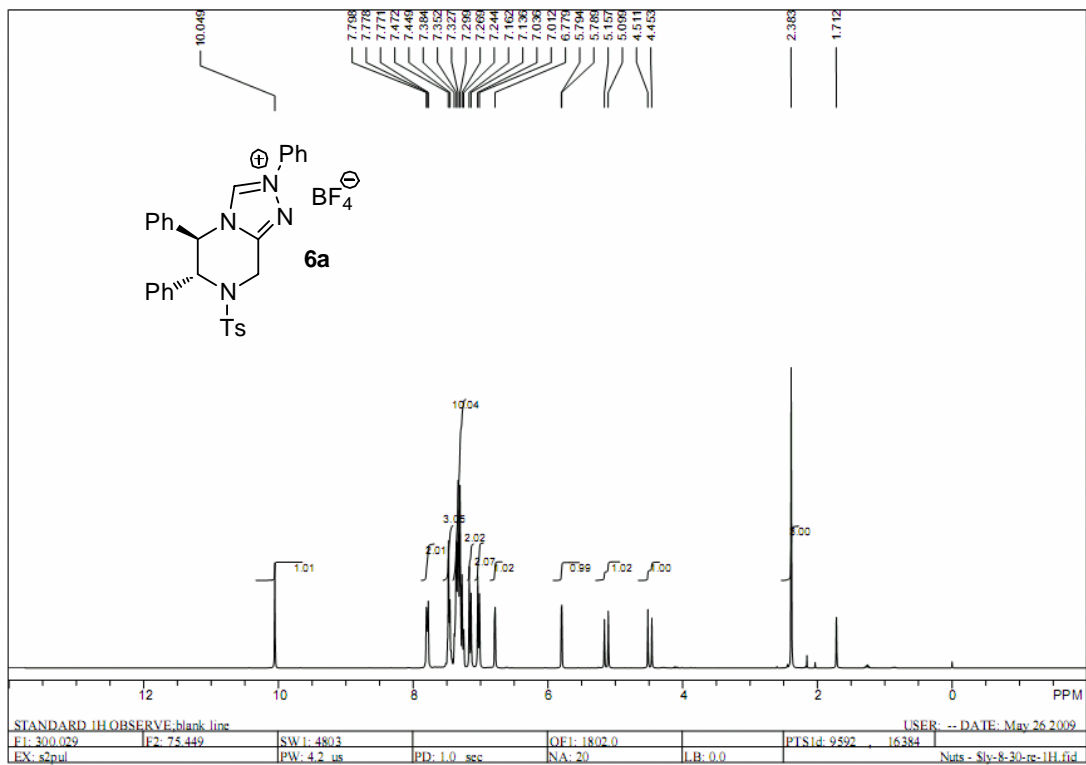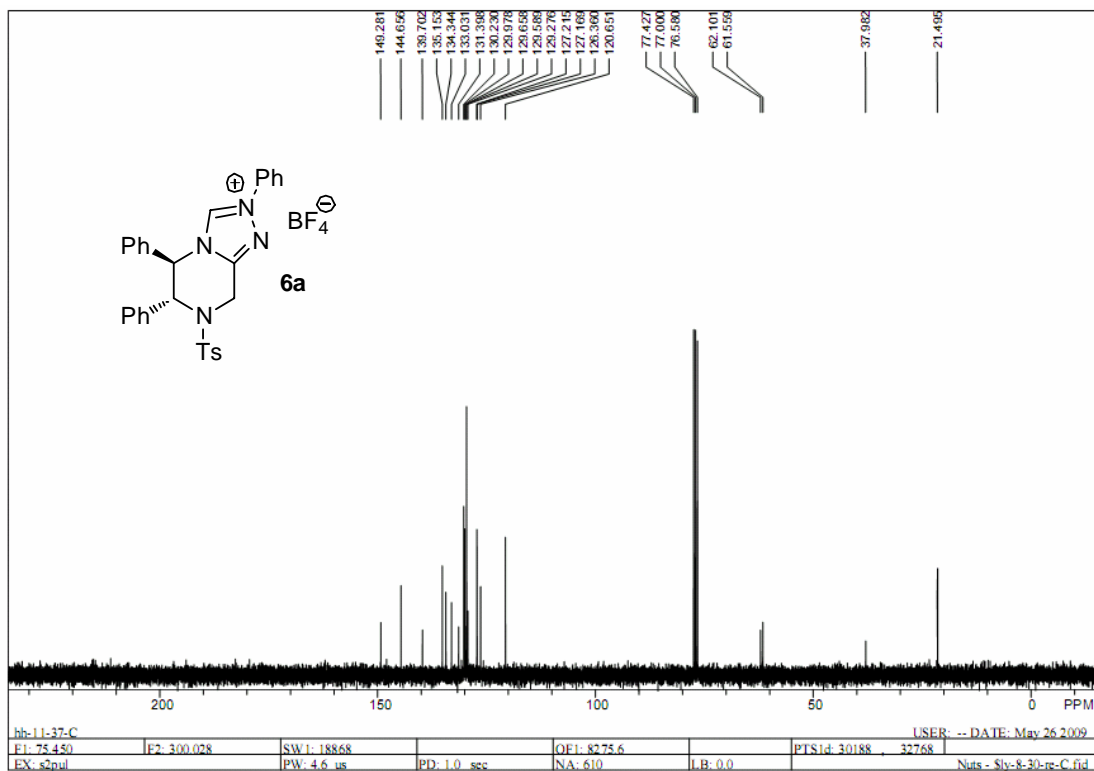

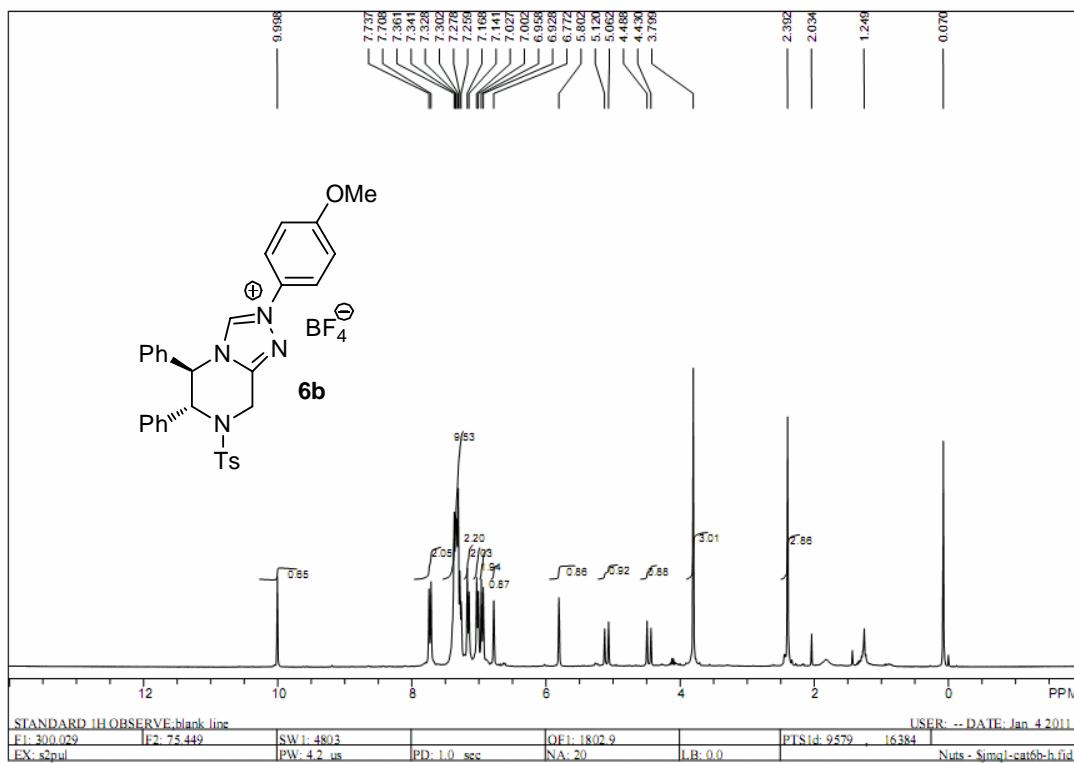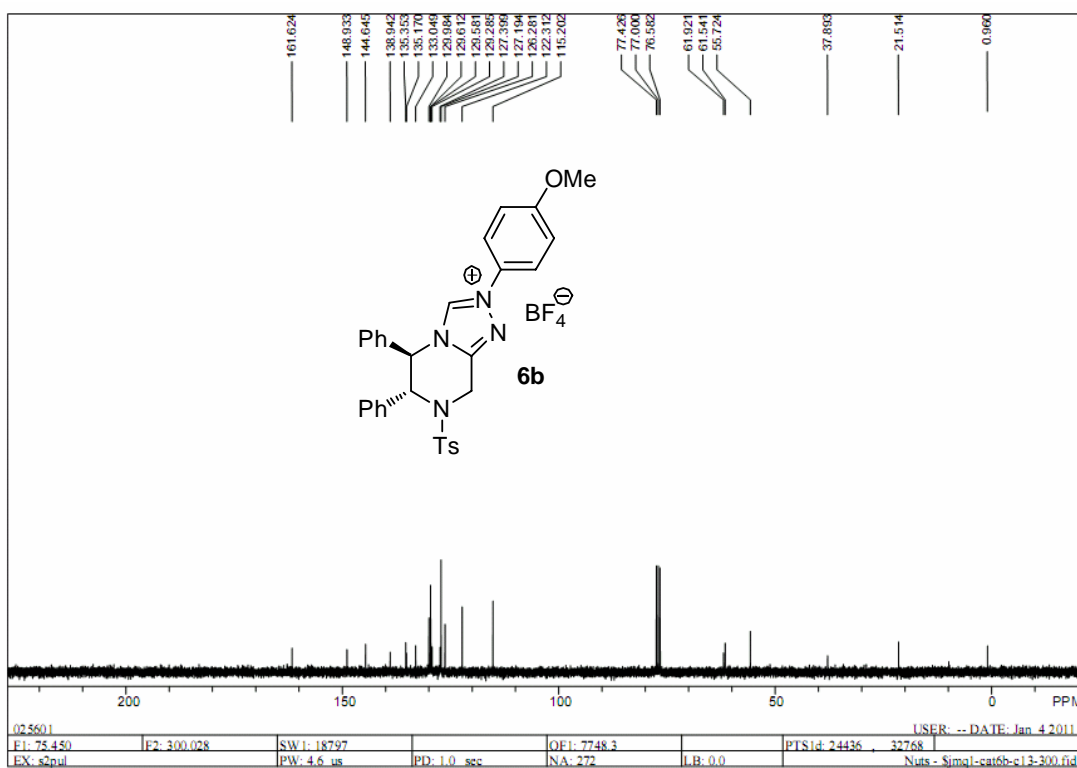

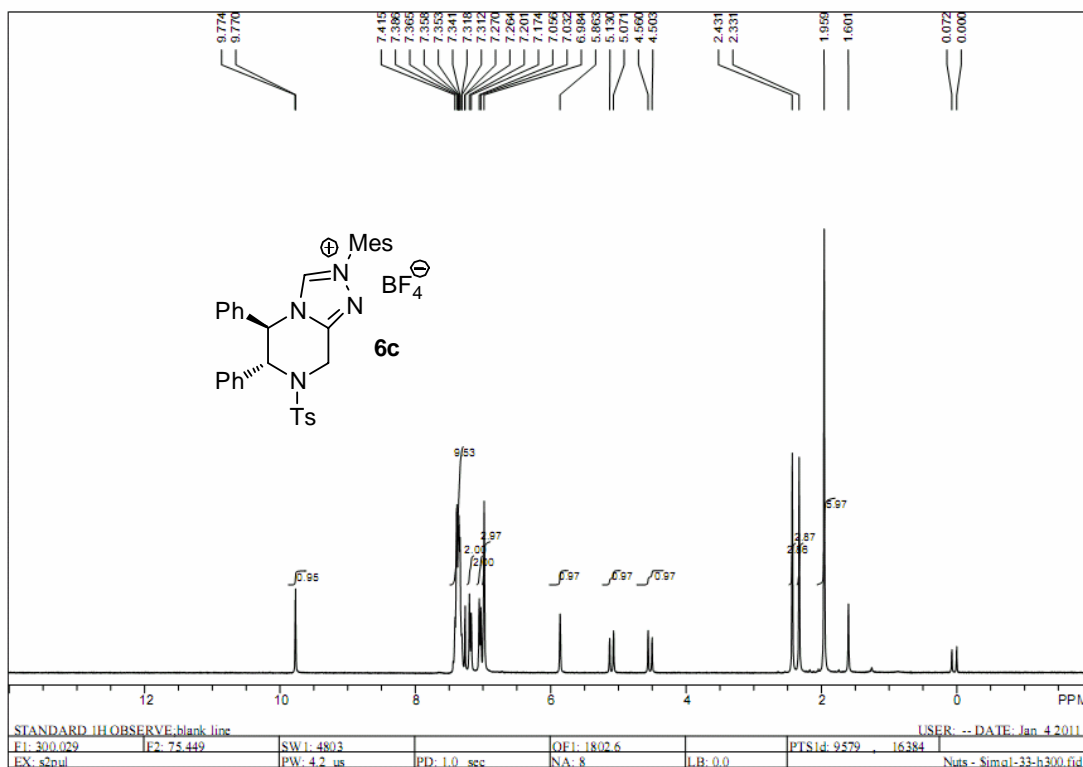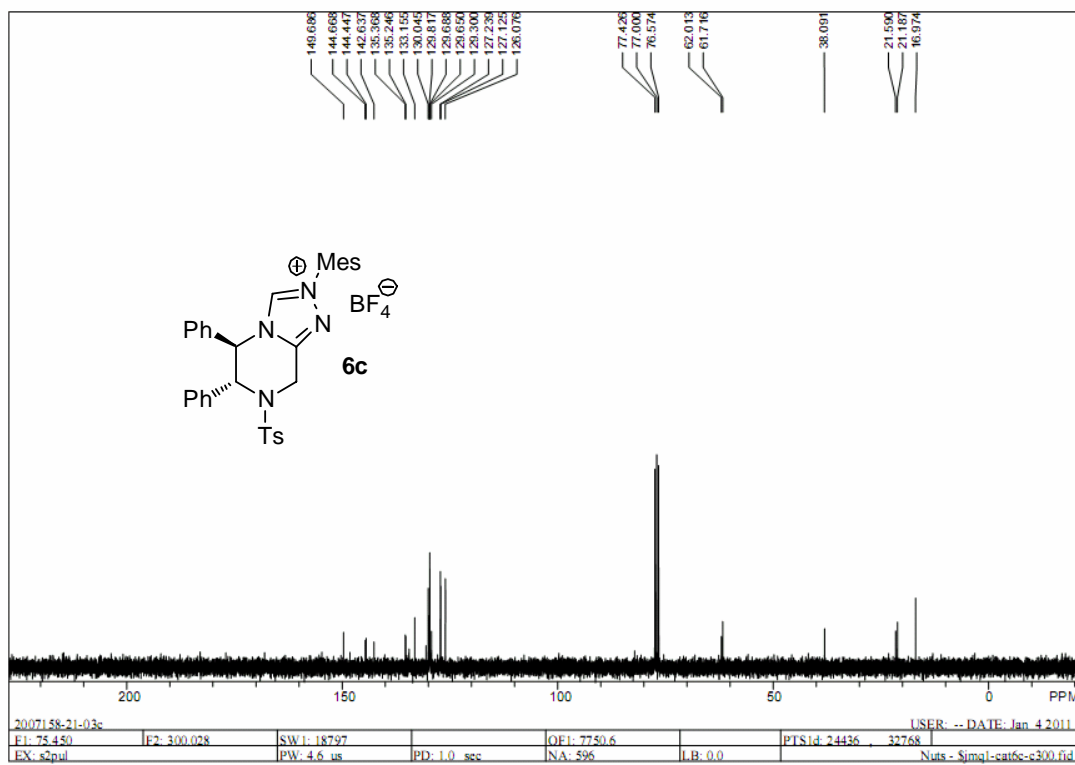

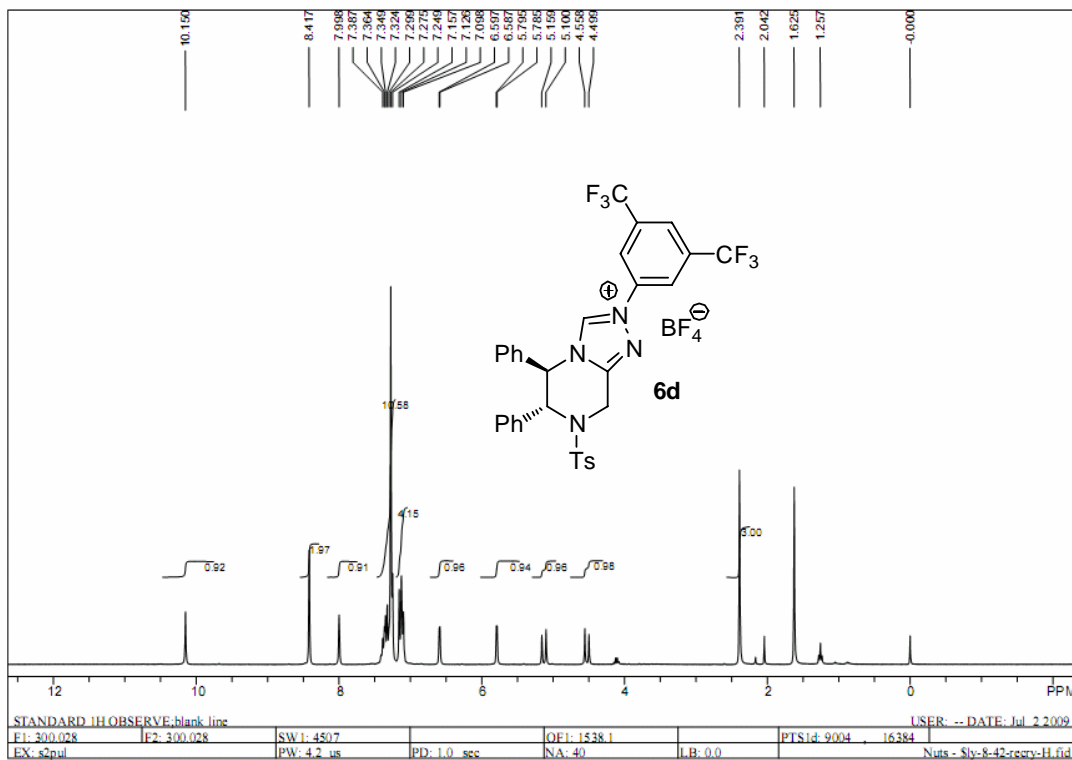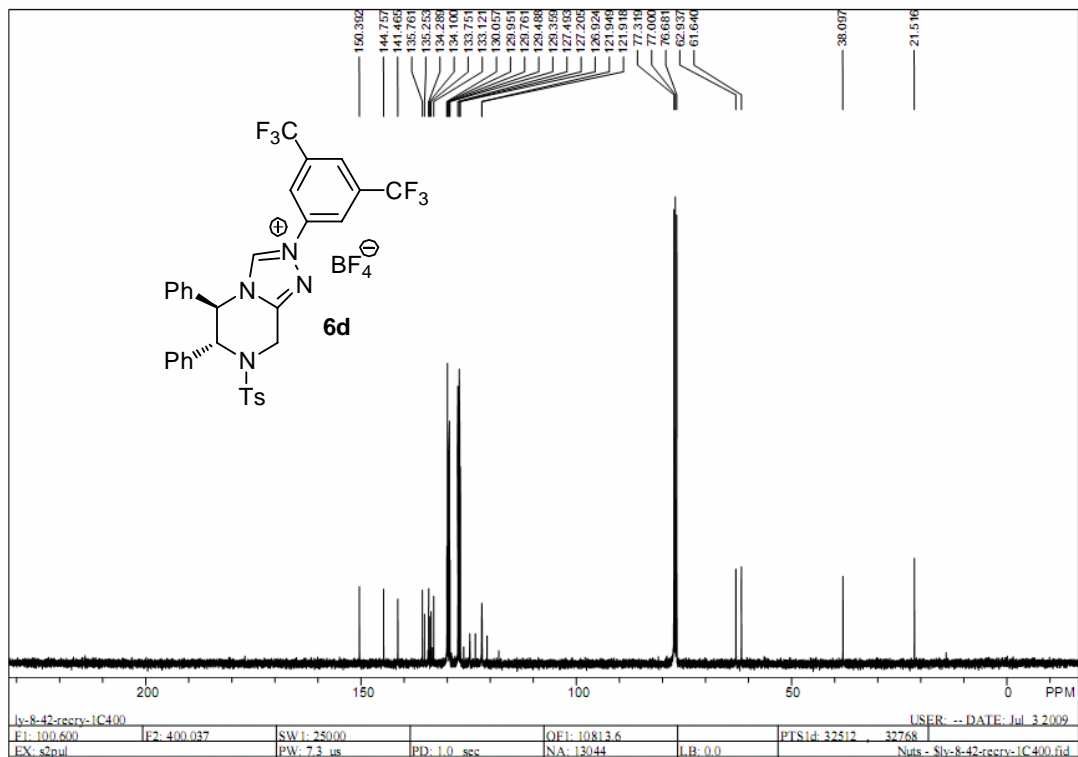

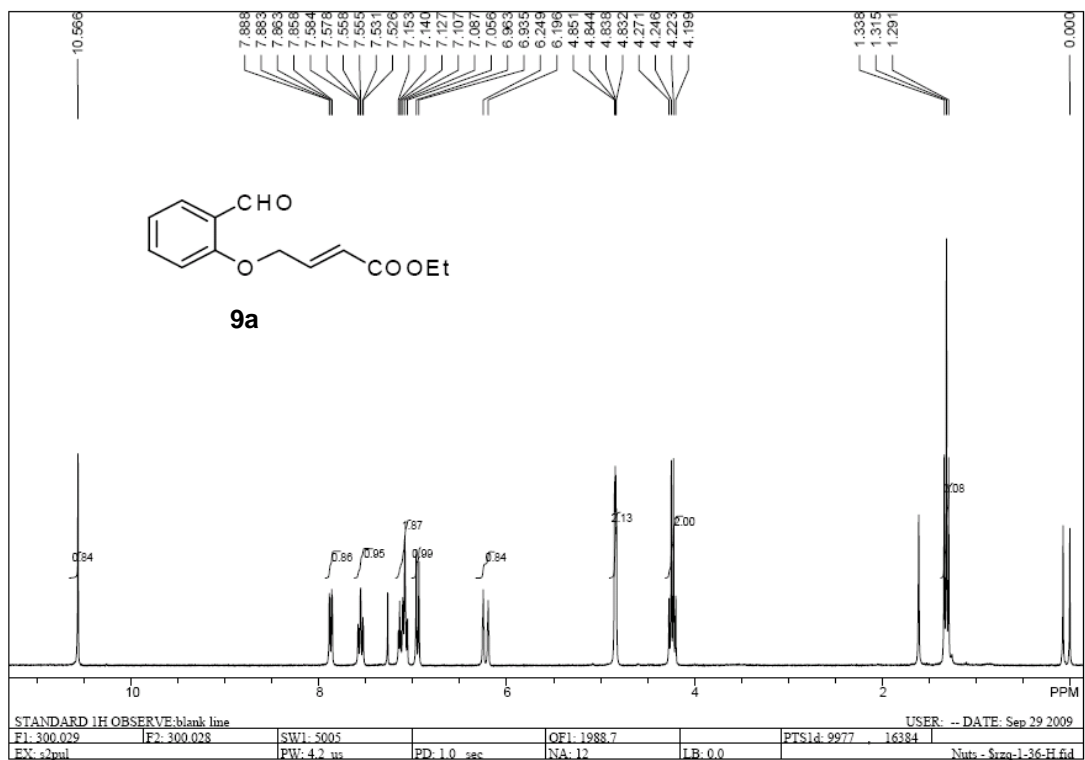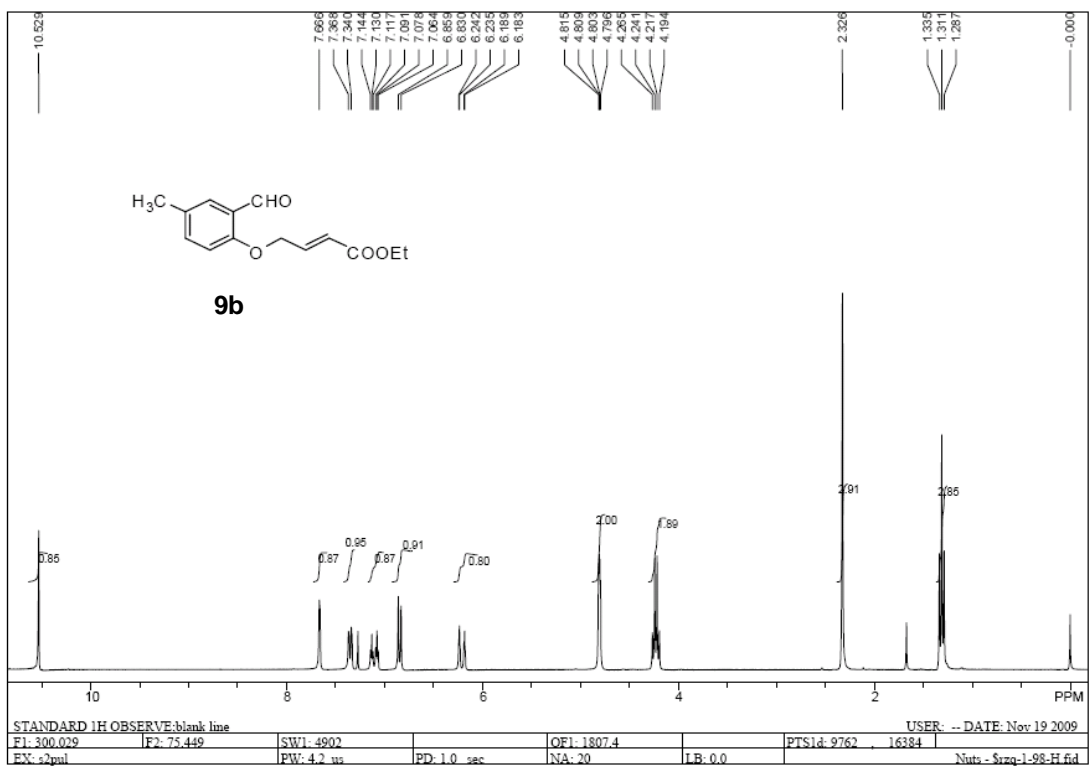

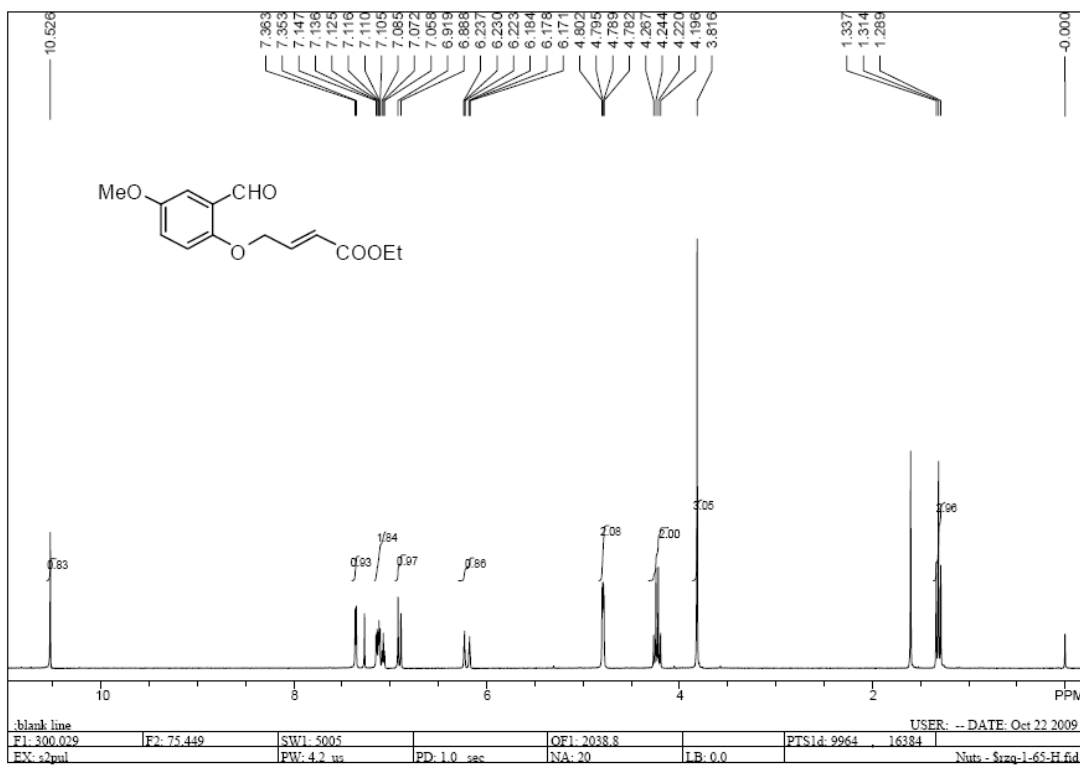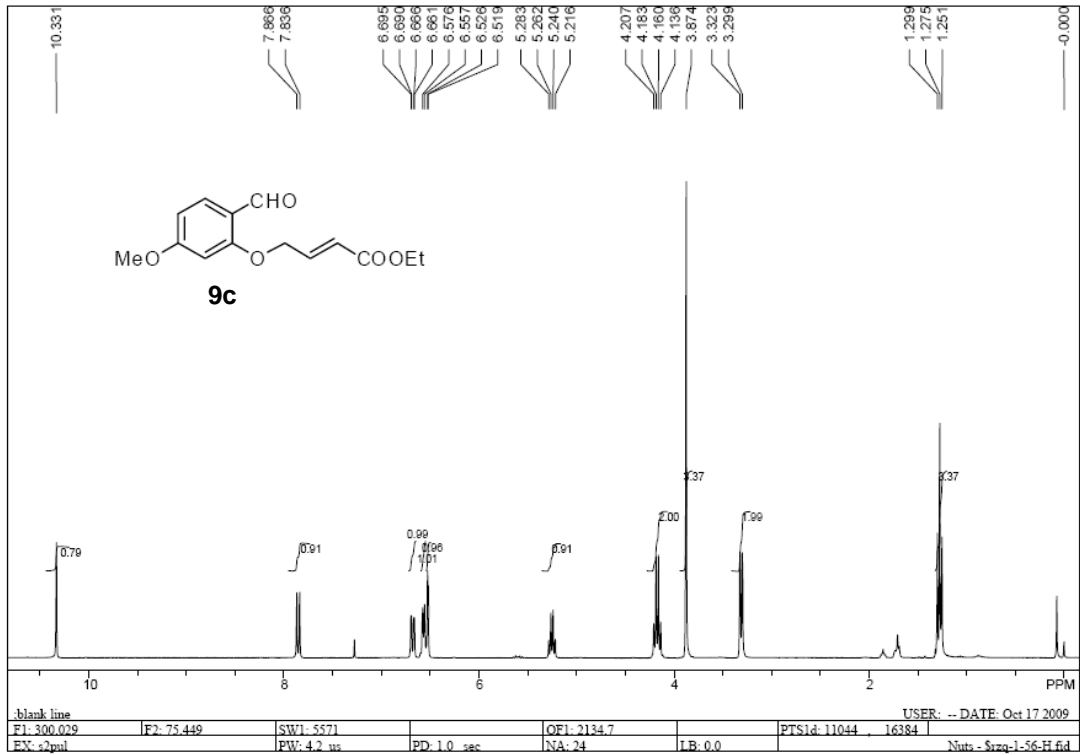

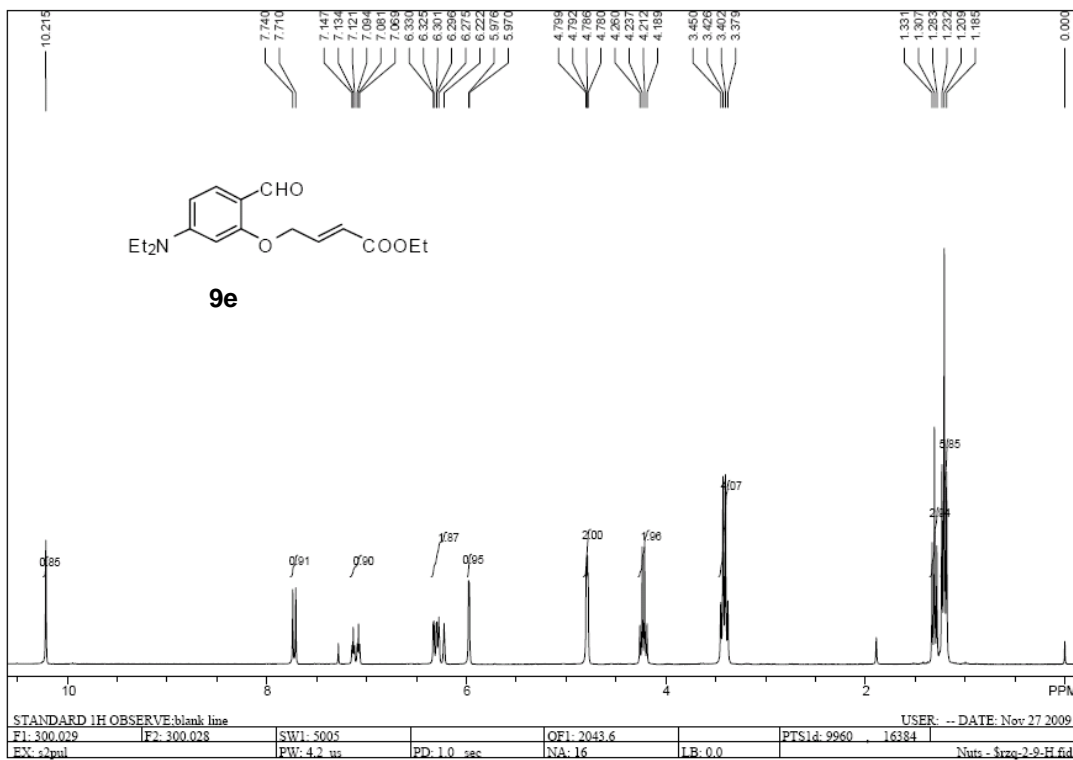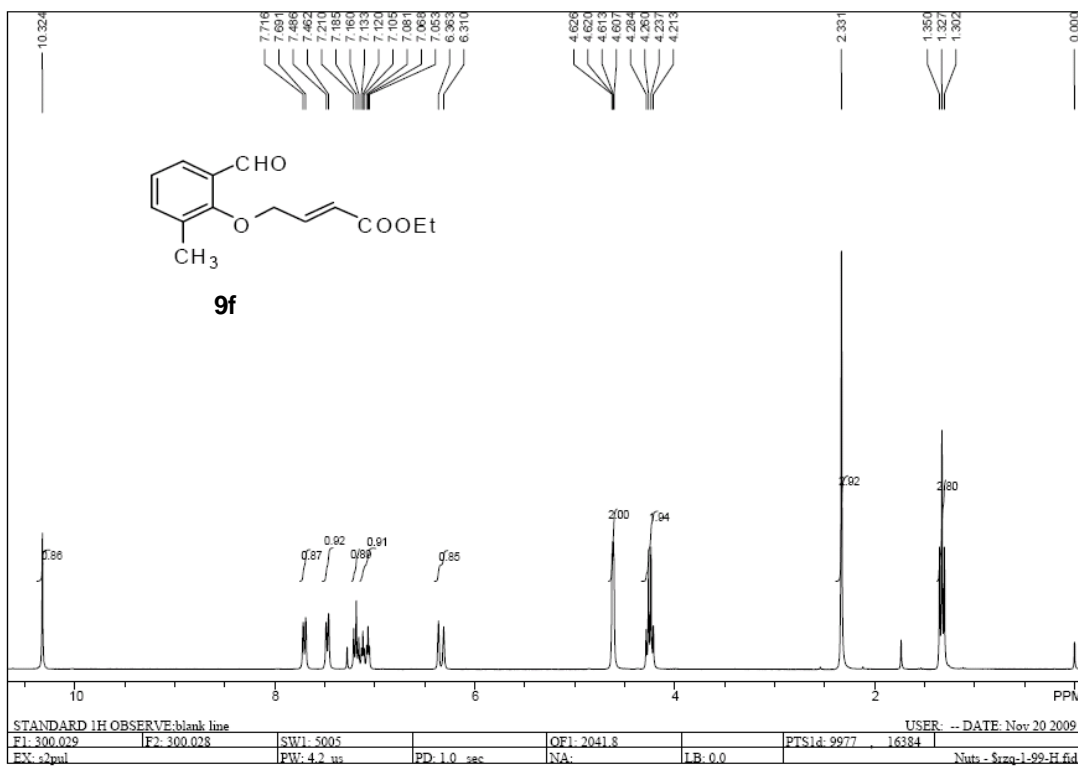



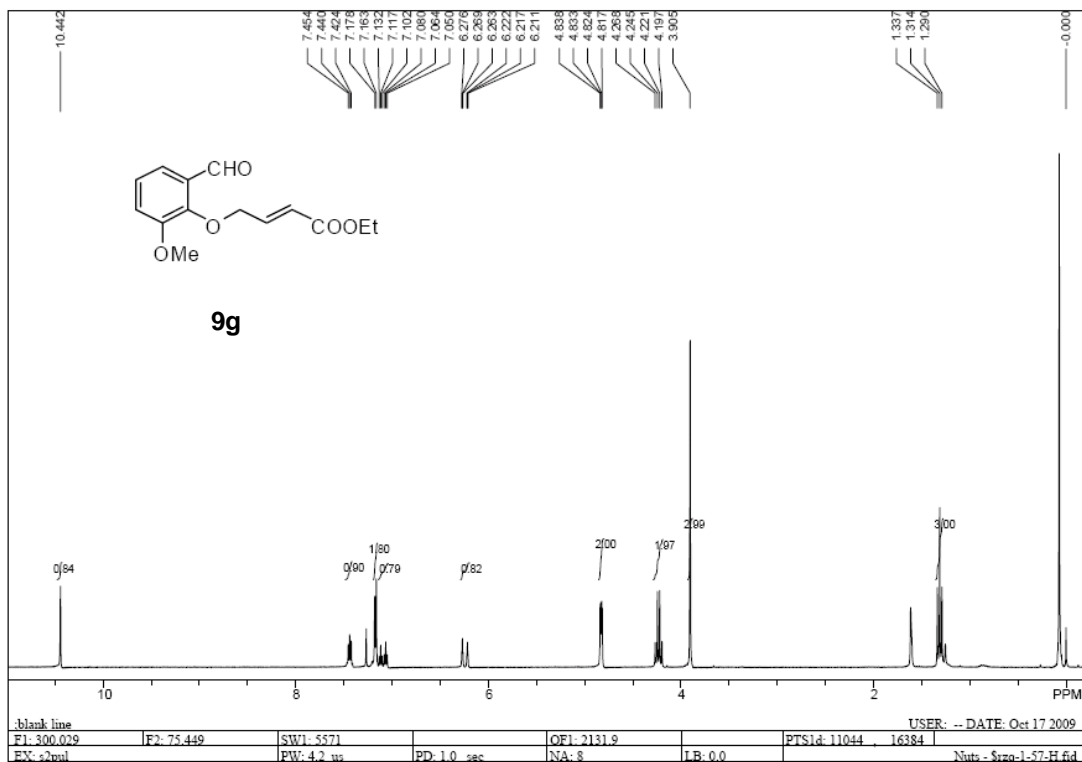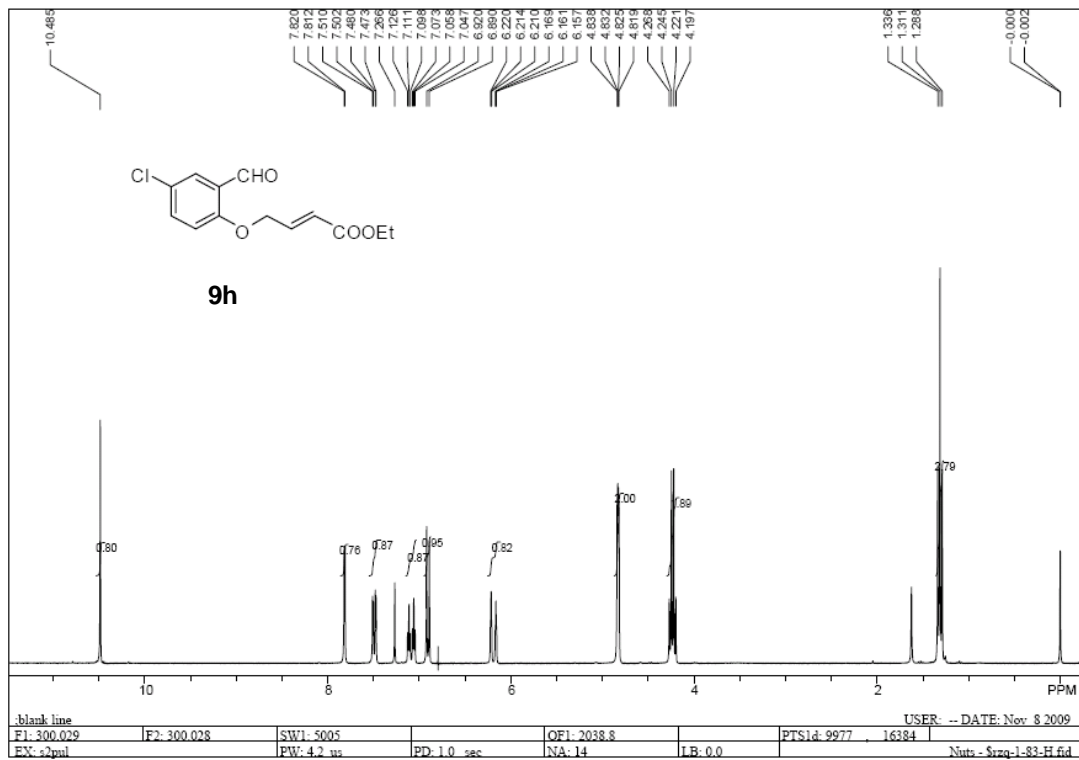

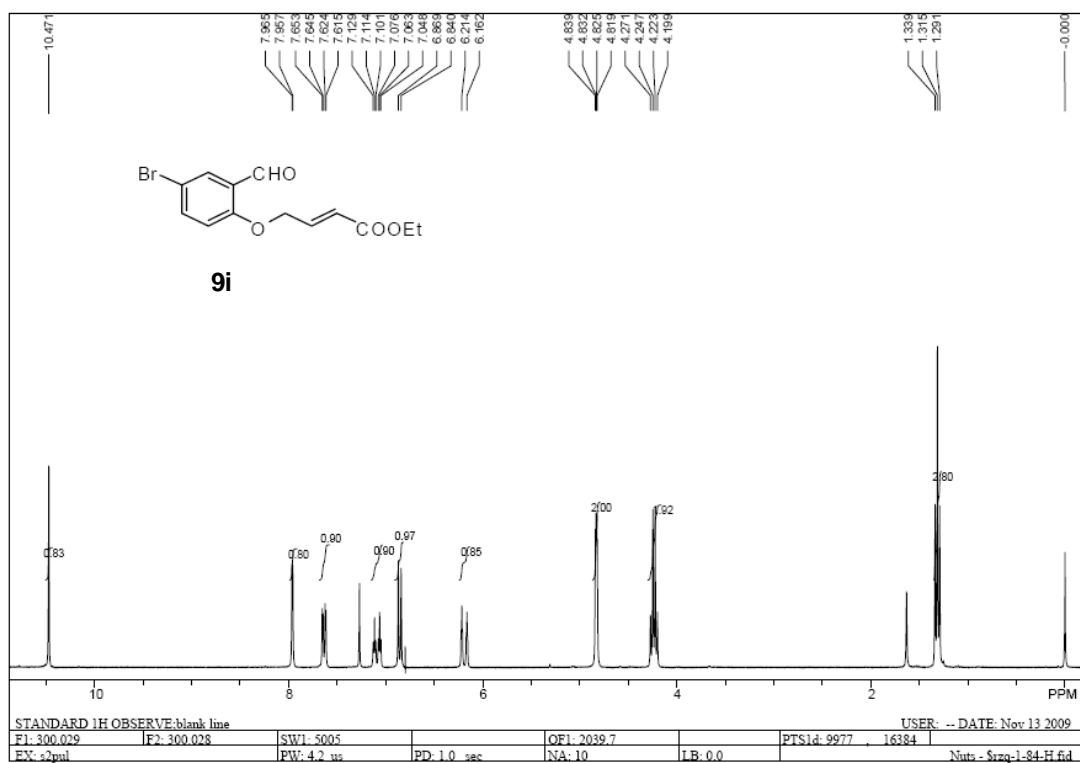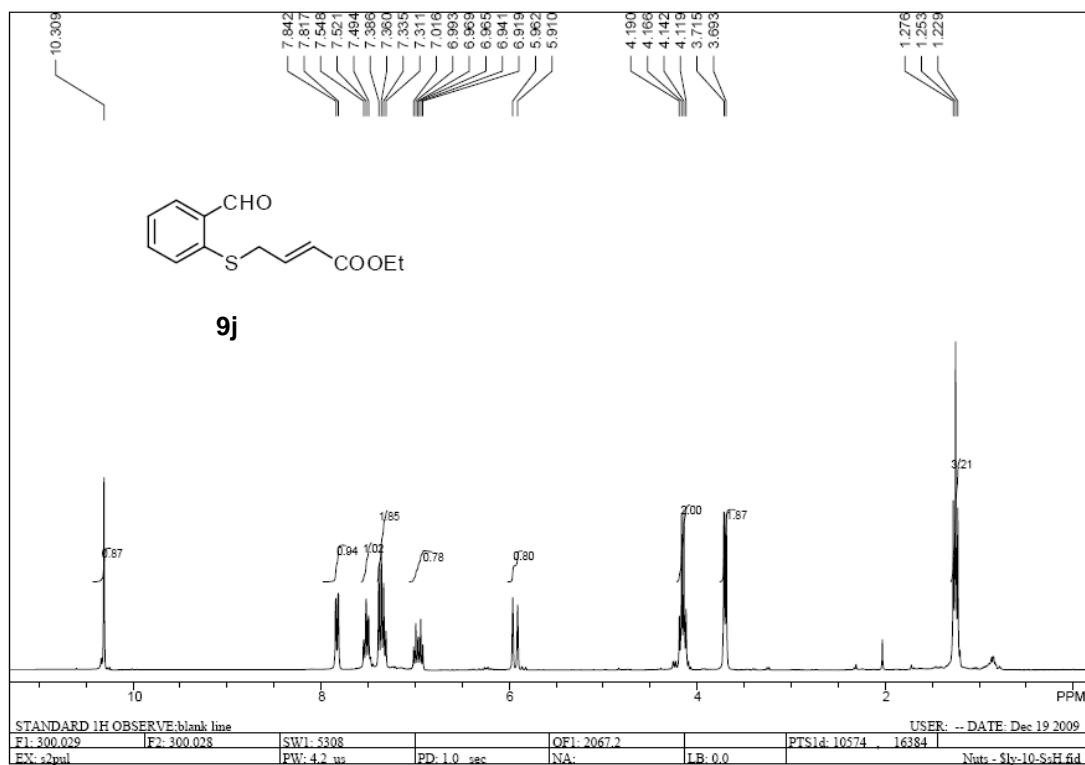

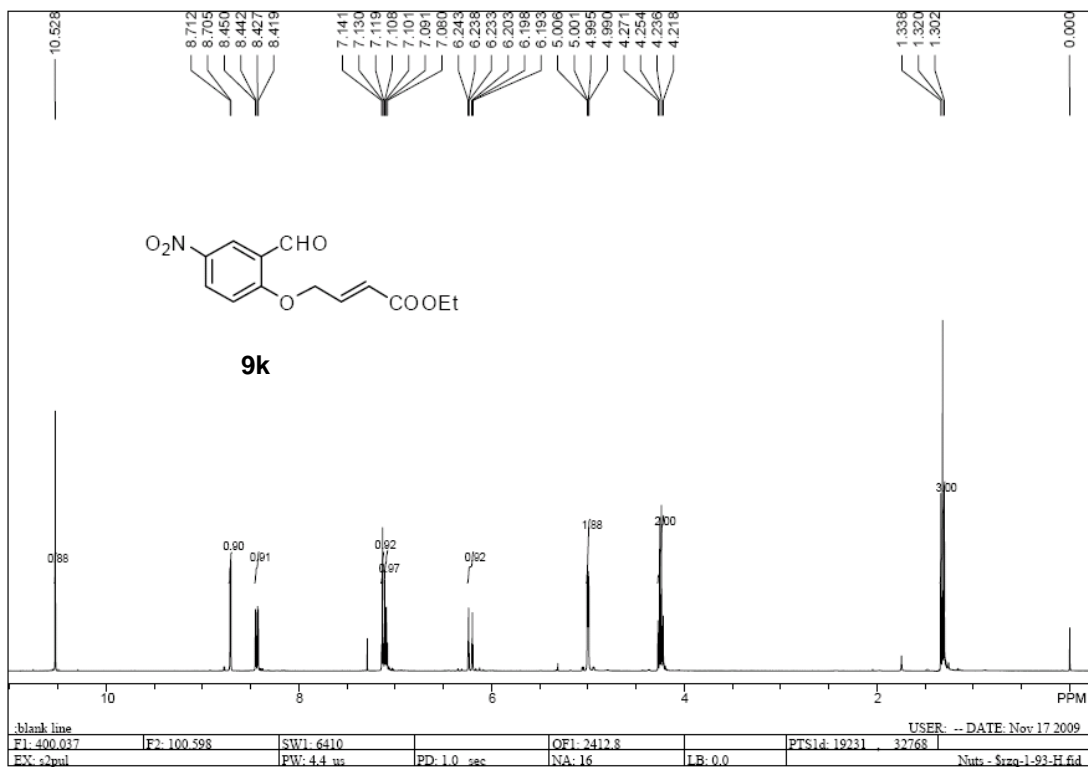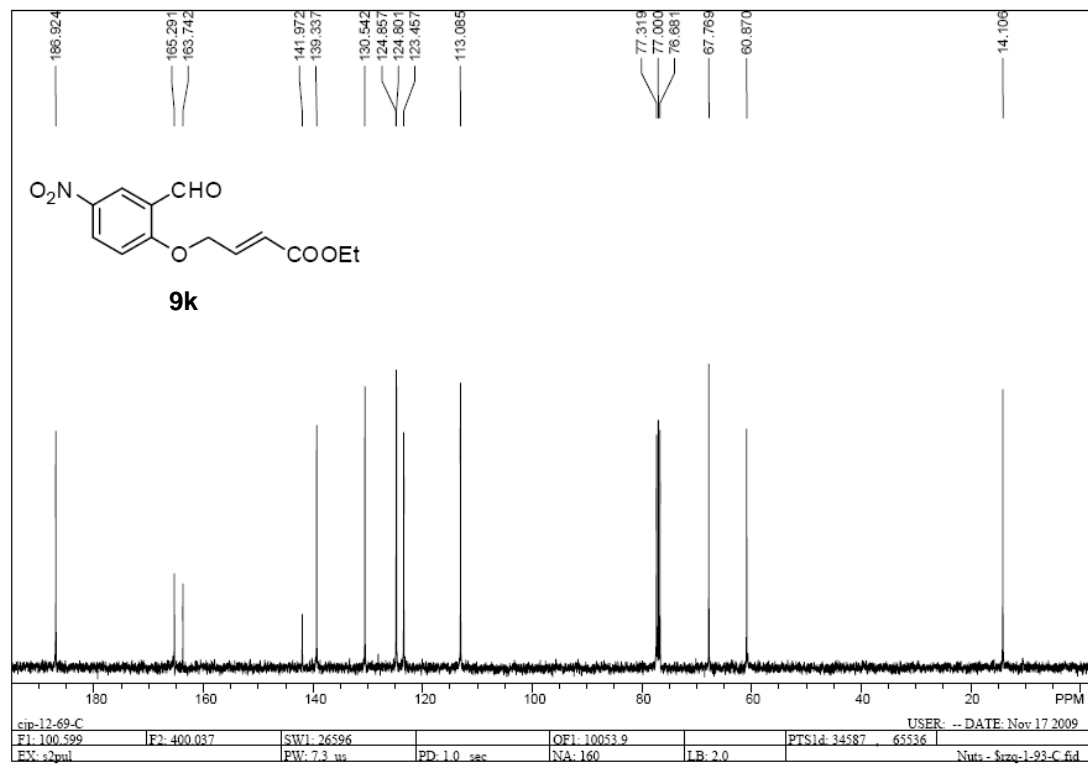

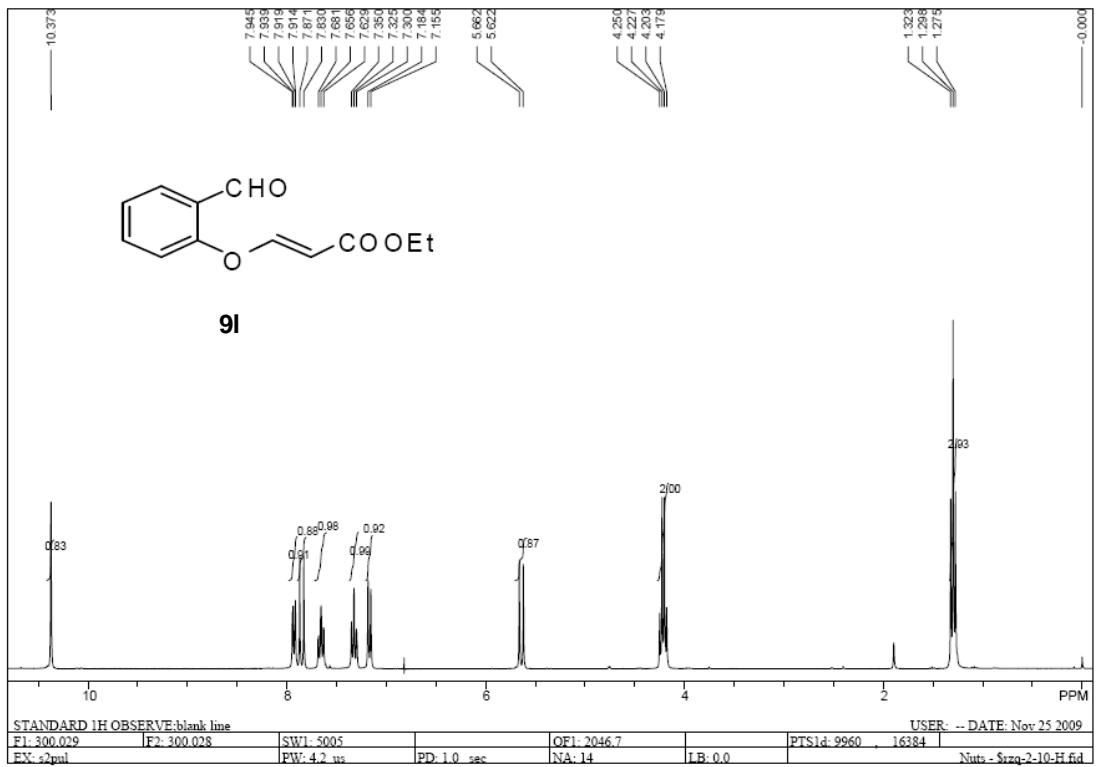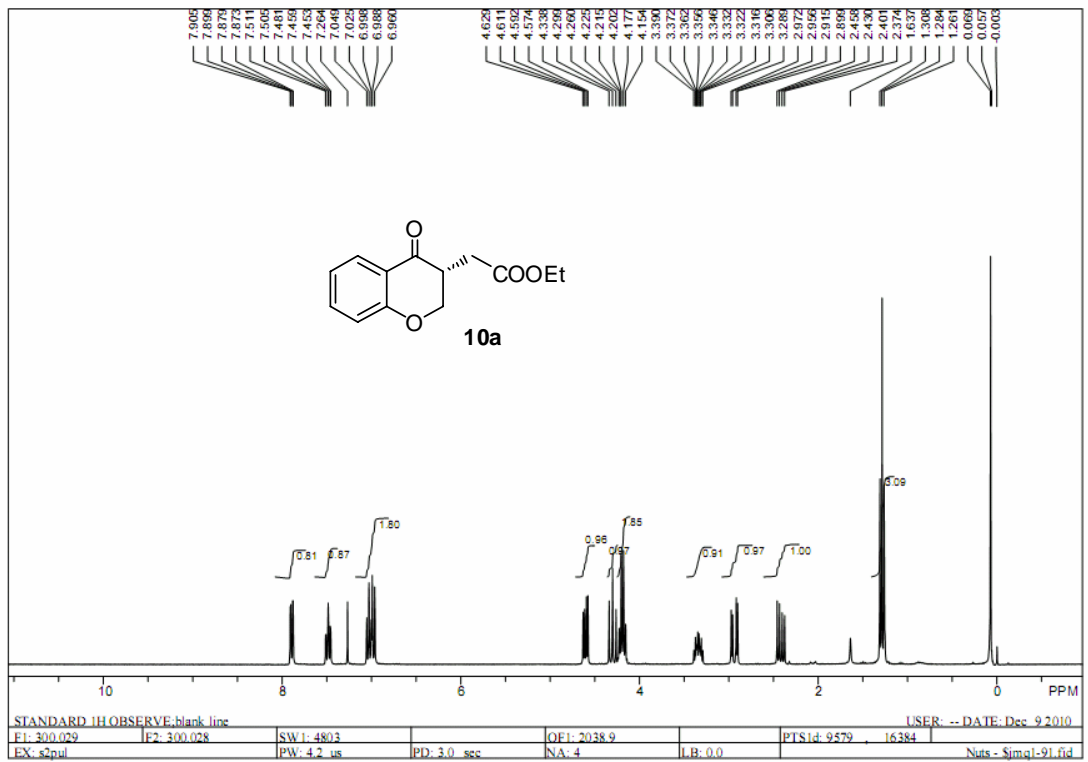

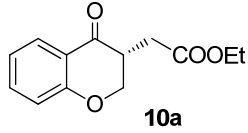

实验时间: 2010-11-15, 19:59:14  
谱图文件: D:\date\jmq\jmq1-6320101115191907.org

实验者: jmq  
报告时间: 2011-01-03, 23:24:55

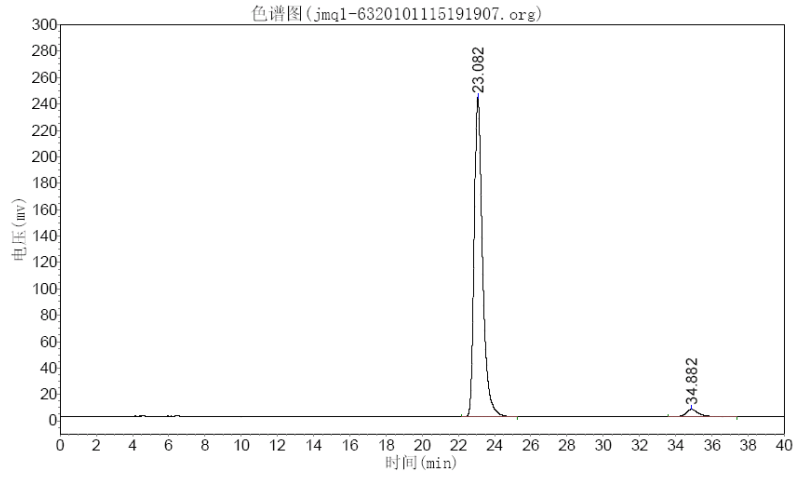

分析结果表

| 峰号 | 峰名 | 保留时间   | 峰高         | 峰面积         | 含量       |
|----|----|--------|------------|-------------|----------|
| 1  |    | 23.082 | 241988.906 | 7704997.500 | 96.6335  |
| 2  |    | 34.882 | 5620.678   | 268429.313  | 3.3665   |
| 总计 |    |        | 247609.584 | 7973426.813 | 100.0000 |

实验时间: 2010-12-5, 14:55:57  
谱图文件: D:\date\jmq\jmq1-rac20101205142119.org

实验者: jmq  
报告时间: 2010-12-5, 14:57:49

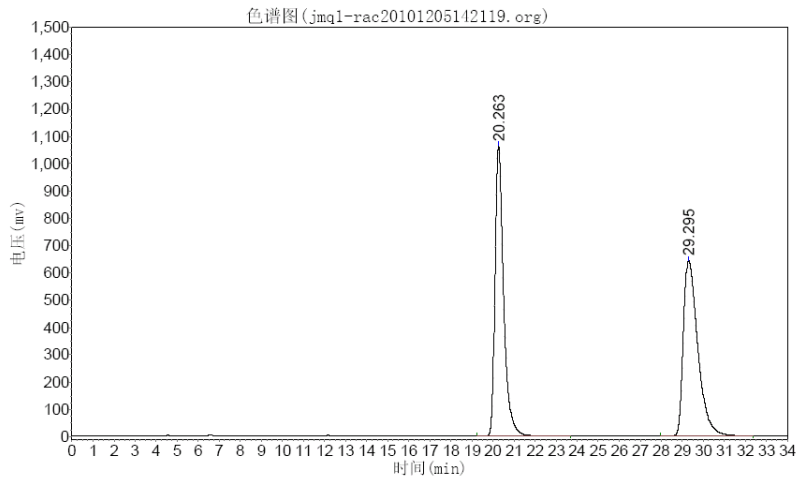

分析结果表

| 峰号 | 峰名 | 保留时间   | 峰高          | 峰面积          | 含量       |
|----|----|--------|-------------|--------------|----------|
| 1  |    | 20.263 | 1063086.500 | 30161286.000 | 49.7534  |
| 2  |    | 29.295 | 642151.813  | 30460318.000 | 50.2466  |
| 总计 |    |        | 1705238.313 | 60621604.000 | 100.0000 |

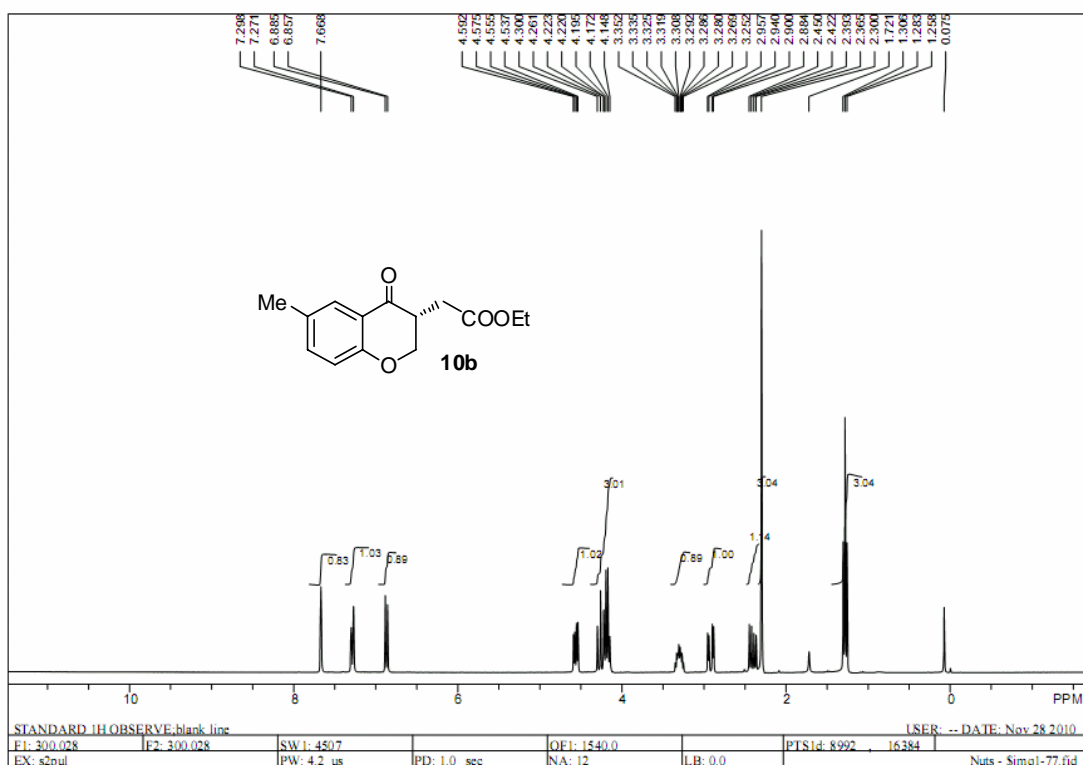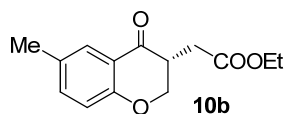

实验时间: 2010-11-27, 16:57:11  
 谱图文件: D:\date\jmq\jmq1-7720101127163048.org

实验者: jmq  
 报告时间: 2011-01-03, 23:39:10

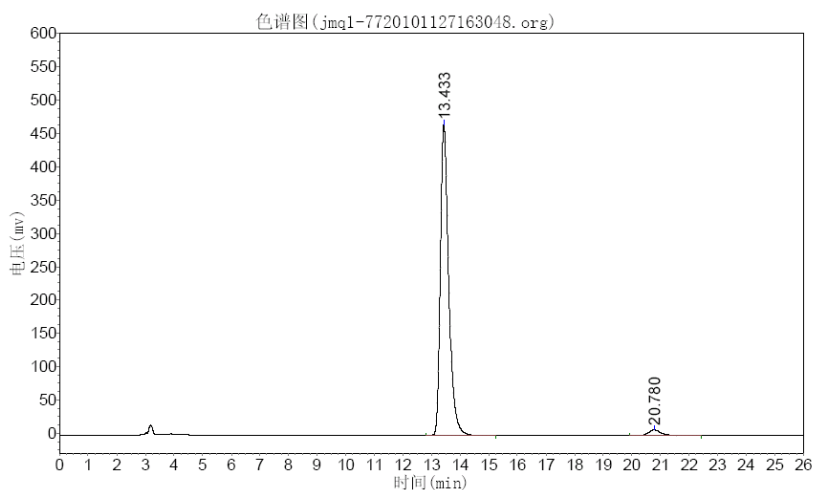

分析结果表

| 峰号 | 峰名 | 保留时间   | 峰高         | 峰面积         | 含量       |
|----|----|--------|------------|-------------|----------|
| 1  |    | 13.433 | 466598.063 | 9521052.000 | 97.2881  |
| 2  |    | 20.780 | 8720.130   | 265401.313  | 2.7119   |
| 总计 |    |        | 475318.192 | 9786453.313 | 100.0000 |

实验时间: 2010-11-27, 17:28:54  
谱图文件: D:\date\jmq\jmq1-77rac20101127165926.org

实验者: jmq  
报告时间: 2011-01-03, 23:40:31

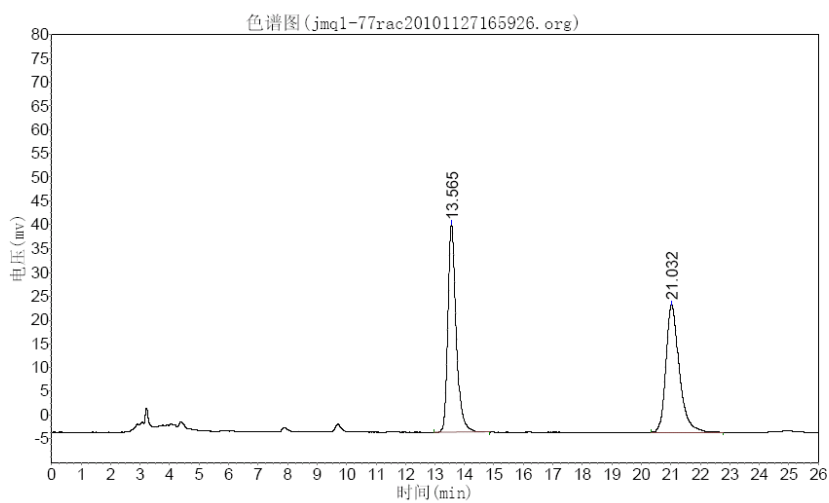

分析结果表

| 峰号 | 峰名 | 保留时间   | 峰高        | 峰面积         | 含量       |
|----|----|--------|-----------|-------------|----------|
| 1  |    | 13.565 | 43694.875 | 863654.875  | 50.7774  |
| 2  |    | 21.032 | 26724.771 | 837208.938  | 49.2226  |
| 总计 |    |        | 70419.646 | 1700863.813 | 100.0000 |

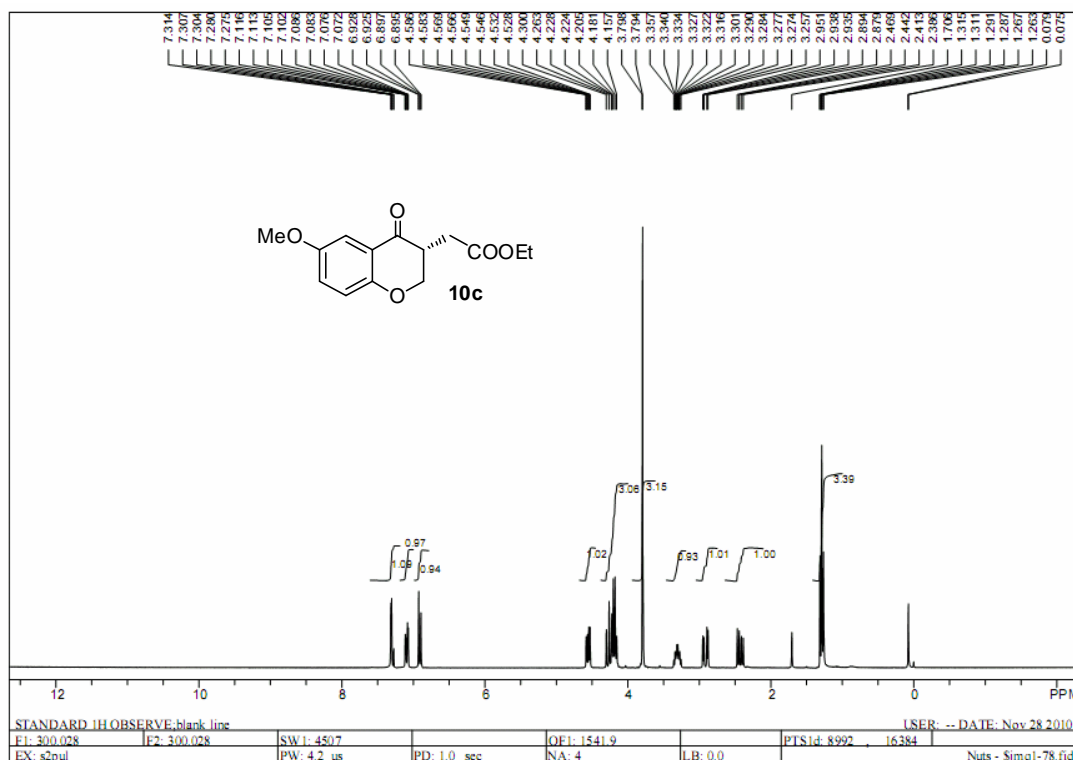

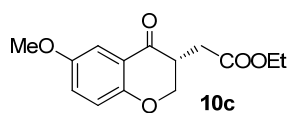

实验时间: 2010-11-27, 18:05:09  
谱图文件: D:\date\jmq\jmq1-7820101127173307.org

实验者: jmq  
报告时间: 2010-11-27, 19:23:59

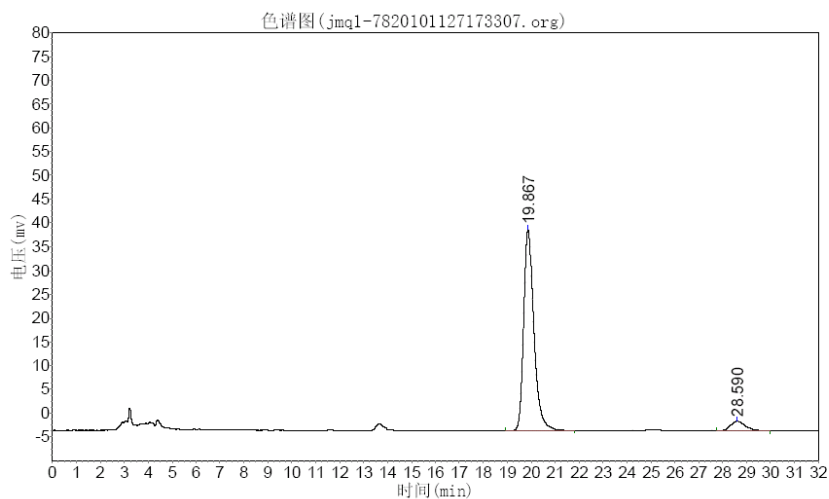

分析结果表

| 峰号 | 峰名 | 保留时间   | 峰高        | 峰面积         | 含量       |
|----|----|--------|-----------|-------------|----------|
| 1  |    | 19.867 | 42243.957 | 1244112.750 | 93.8639  |
| 2  |    | 28.590 | 1939.420  | 81330.930   | 6.1361   |
| 总计 |    |        | 44183.377 | 1325443.680 | 100.0000 |

实验时间: 2010-11-27, 18:44:55  
谱图文件: D:\date\jmq\jmq1-78rac20101127181020.org

实验者: jmq  
报告时间: 2010-11-27, 19:19:15

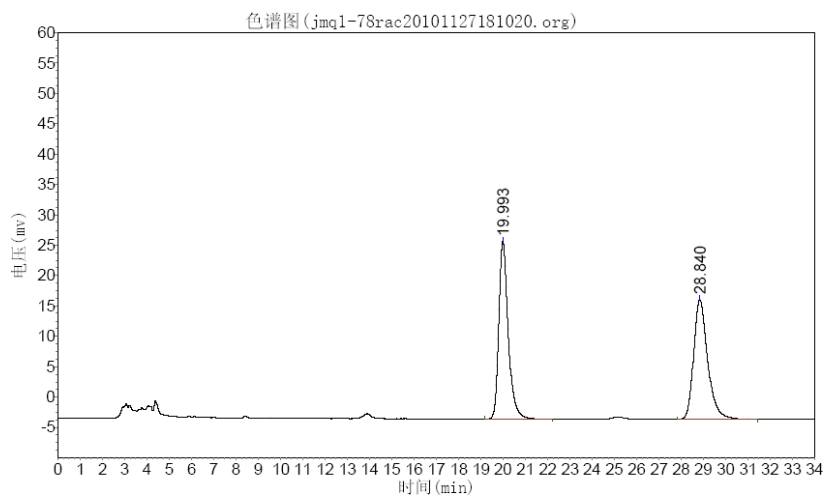

分析结果表

| 峰号 | 峰名 | 保留时间   | 峰高        | 峰面积         | 含量       |
|----|----|--------|-----------|-------------|----------|
| 1  |    | 19.993 | 29288.502 | 869811.625  | 50.1339  |
| 2  |    | 28.840 | 19751.318 | 865163.750  | 49.8661  |
| 总计 |    |        | 49039.820 | 1734975.375 | 100.0000 |



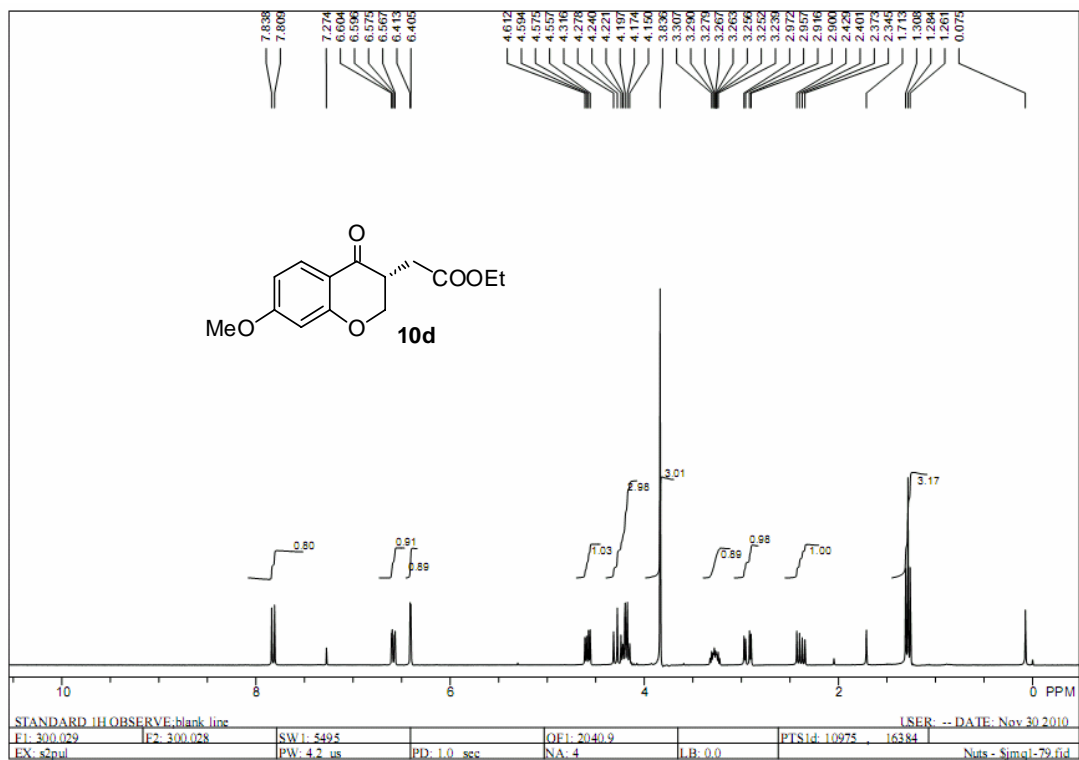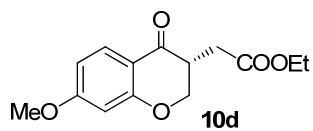

实验时间: 2010-11-29, 14:03:47  
 谱图文件: D:\date\jmq\jmq1-7920101129132810.org

实验者: jmq  
 报告时间: 2011-01-03, 23:42:45

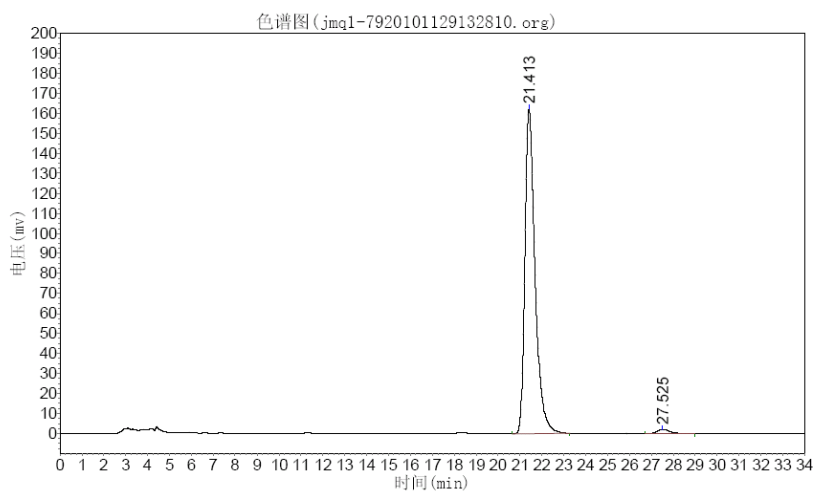

分析结果表

| 峰号 | 峰名 | 保留时间   | 峰高         | 峰面积         | 含量       |
|----|----|--------|------------|-------------|----------|
| 1  |    | 21.413 | 162249.422 | 5262747.000 | 98.3419  |
| 2  |    | 27.525 | 2216.440   | 88731.500   | 1.6581   |
| 总计 |    |        | 164465.862 | 5351478.500 | 100.0000 |

实验时间: 2010-11-29, 14:48:05  
谱图文件: D:\date\jmq\jmq1-79rac20101129140359.org

实验者: jmq  
报告时间: 2010-11-29, 14:53:35

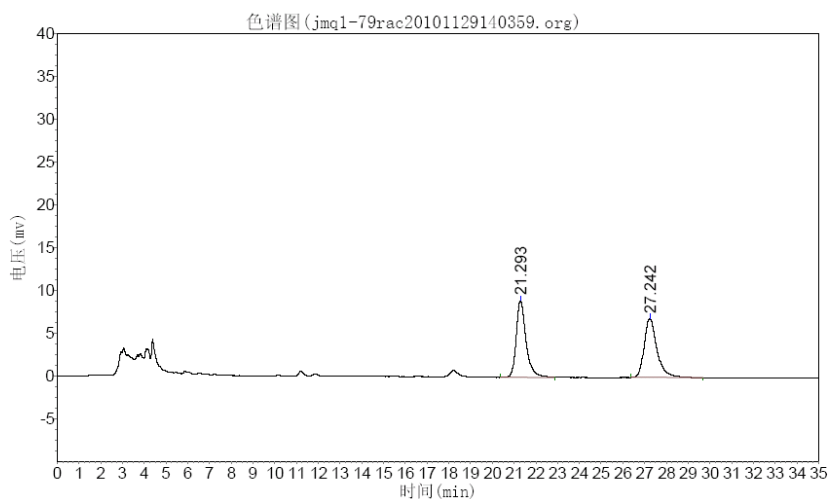

分析结果表

| 峰号 | 峰名 | 保留时间   | 峰高        | 峰面积        | 含量       |
|----|----|--------|-----------|------------|----------|
| 1  |    | 21.293 | 8996.183  | 281985.188 | 49.8550  |
| 2  |    | 27.242 | 6954.303  | 280161.156 | 49.5325  |
| 3  |    | 37.310 | 75.651    | 3464.700   | 0.6126   |
| 总计 |    |        | 16026.137 | 565611.043 | 100.0000 |

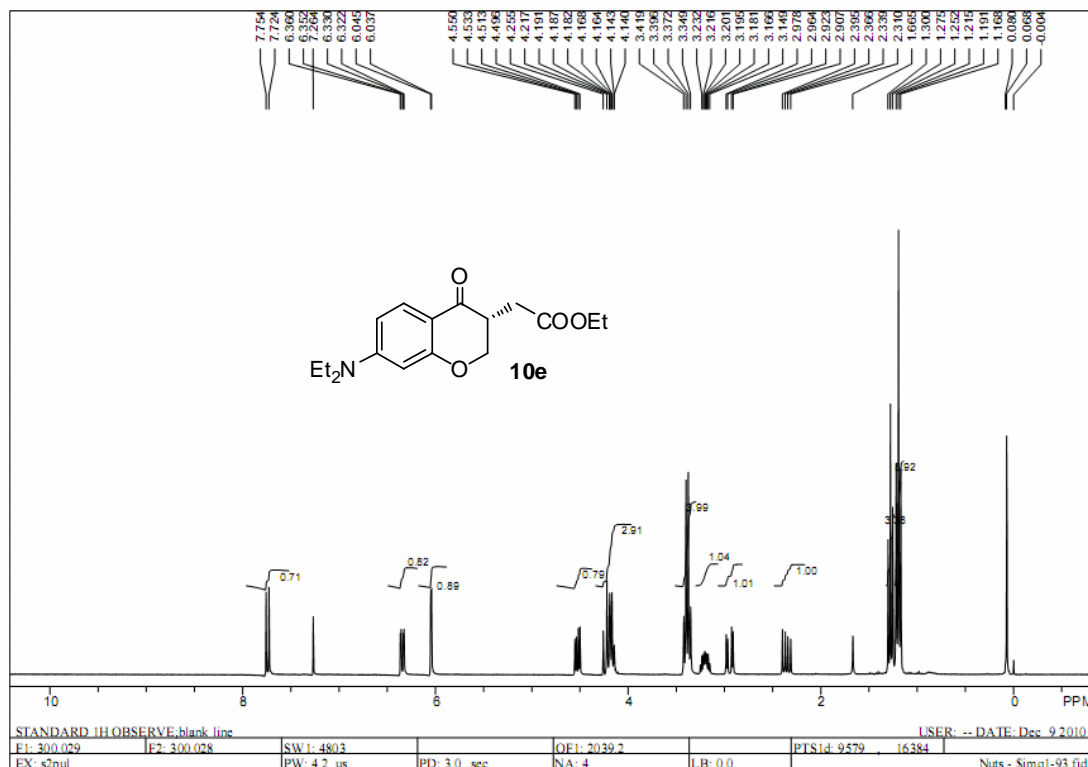

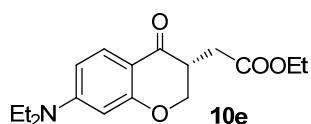

实验时间: 2010-12-9, 11:18:01  
谱图文件: D:\date\jmq\jmq1-9320101209104701.org

实验者: jmq  
报告时间: 2010-12-9, 11:21:07

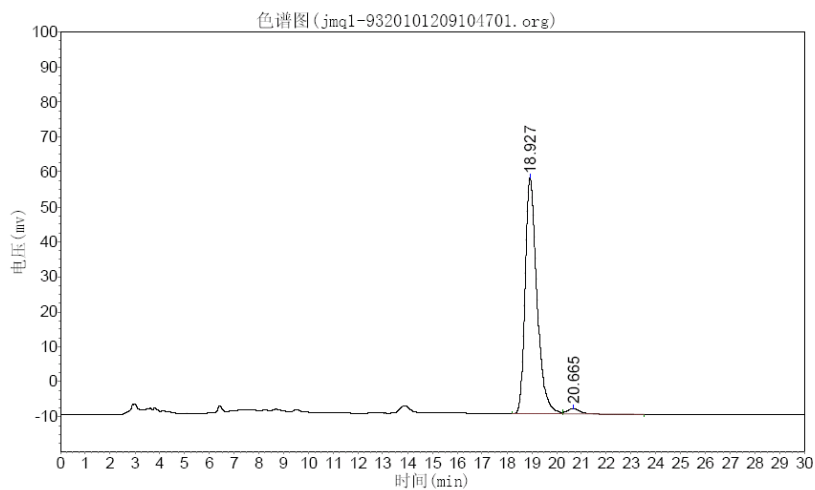

分析结果表

| 峰号 | 峰名 | 保留时间   | 峰高        | 峰面积         | 含量       |
|----|----|--------|-----------|-------------|----------|
| 1  |    | 18.927 | 67457.563 | 2243350.500 | 97.6320  |
| 2  |    | 20.665 | 1586.243  | 54411.020   | 2.3680   |
| 总计 |    |        | 69043.805 | 2297761.520 | 100.0000 |

实验时间: 2010-12-9, 12:23:25  
谱图文件: D:\date\jmq\jmq1-93rac20101209115811.org

实验者: jmq  
报告时间: 2010-12-9, 12:27:49

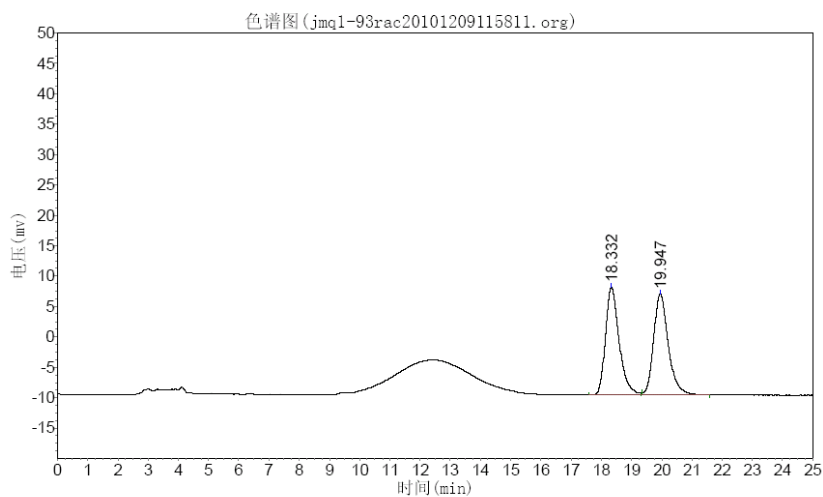

分析结果表

| 峰号 | 峰名 | 保留时间   | 峰高        | 峰面积         | 含量       |
|----|----|--------|-----------|-------------|----------|
| 1  |    | 18.332 | 17764.010 | 555142.813  | 49.8923  |
| 2  |    | 19.947 | 16584.771 | 557539.688  | 50.1077  |
| 总计 |    |        | 34348.781 | 1112682.500 | 100.0000 |

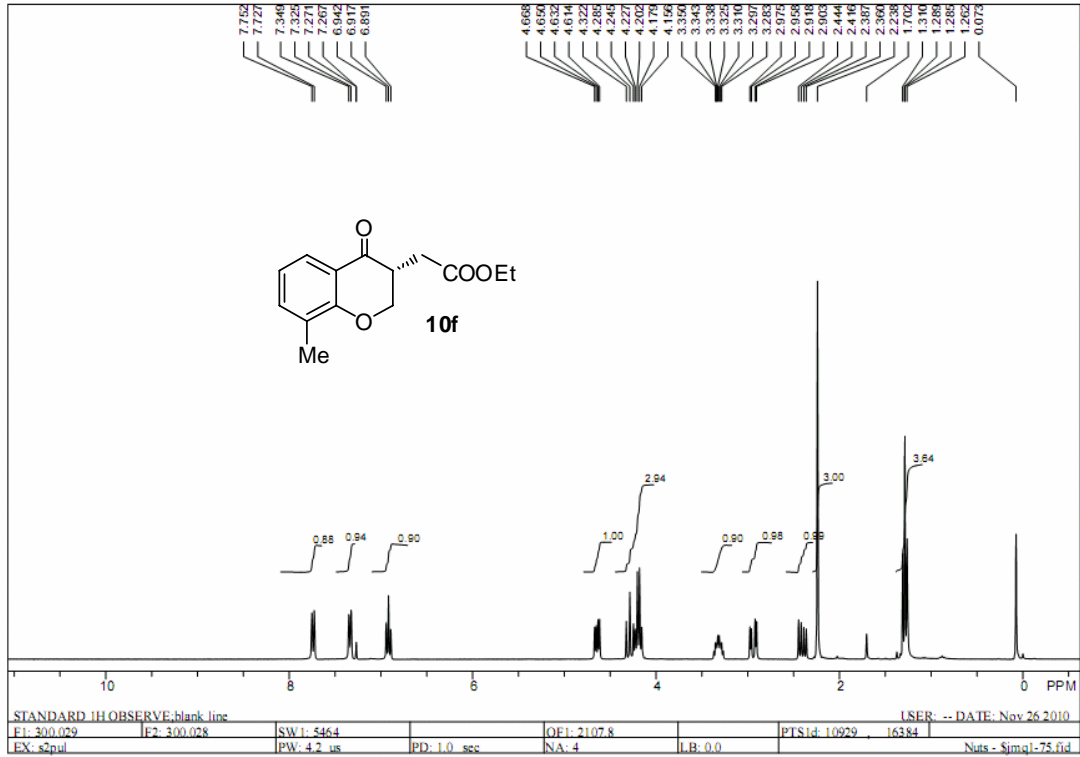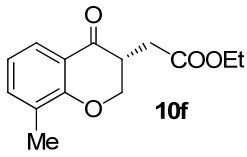

实验时间: 2010-11-25, 9:30:27  
谱图文件: D:\date\jmq\jmq1-7520101125085137.org

实验者: jmq  
报告时间: 2011-01-03, 23:34:06

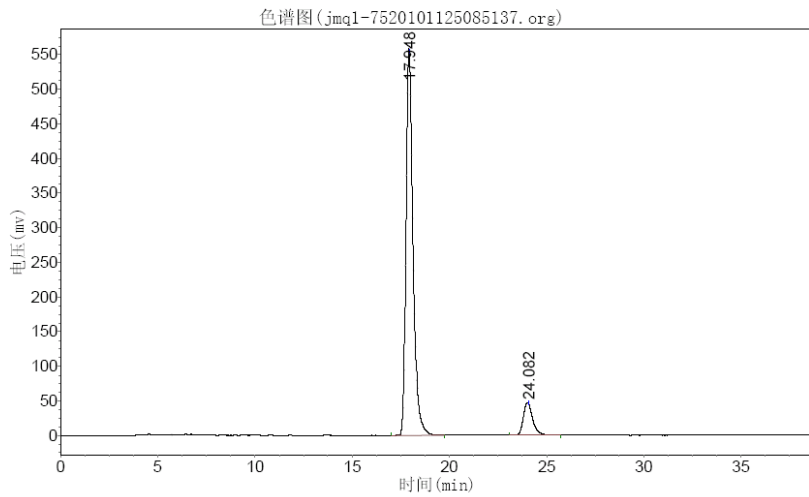

分析结果表

| 峰号 | 峰名 | 保留时间   | 峰高         | 峰面积          | 含量       |
|----|----|--------|------------|--------------|----------|
| 1  |    | 17.948 | 555687.938 | 14029590.000 | 90.0028  |
| 2  |    | 24.082 | 45928.531  | 1558358.625  | 9.9972   |
| 总计 |    |        | 601616.469 | 15587948.625 | 100.0000 |

实验时间: 2010-11-25, 10:01:09  
谱图文件: D:\date\jmq\jmq1-75rac20101125093228.org

实验者: jmq  
报告时间: 2011-01-03, 23:37:09

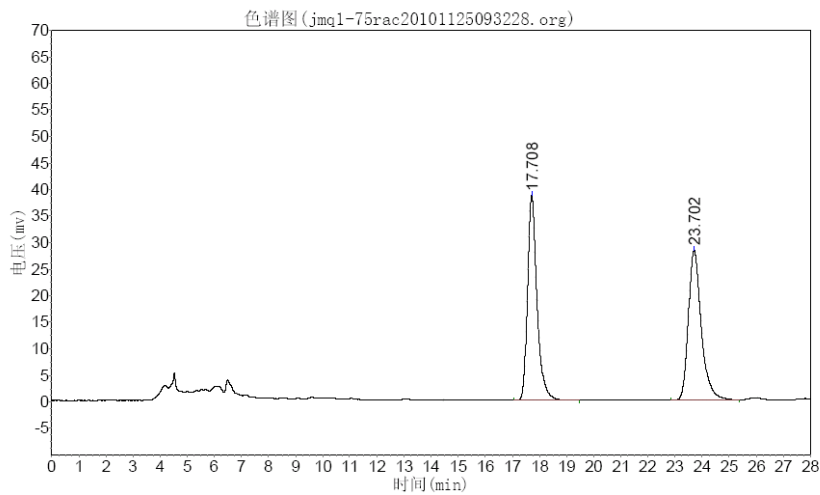

分析结果表

| 峰号 | 峰名 | 保留时间   | 峰高        | 峰面积         | 含量       |
|----|----|--------|-----------|-------------|----------|
| 1  |    | 17.708 | 38563.473 | 943461.313  | 50.0665  |
| 2  |    | 23.702 | 28310.521 | 940956.750  | 49.9335  |
| 总计 |    |        | 66873.994 | 1884418.063 | 100.0000 |

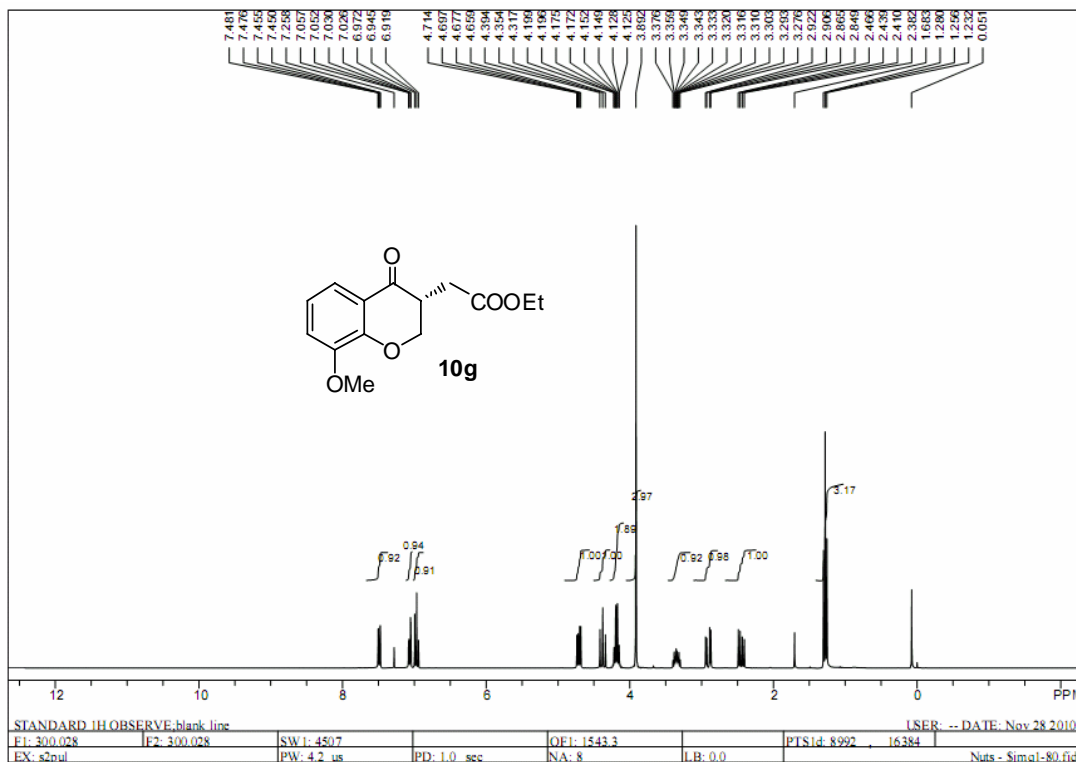

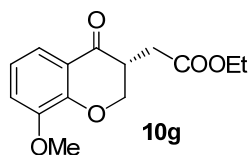

实验时间: 2010-11-27, 20:22:31  
谱图文件: D:\date\jmq\jmq1-8020101127195622.org

实验者: jmq  
报告时间: 2010-11-27, 20:27:19

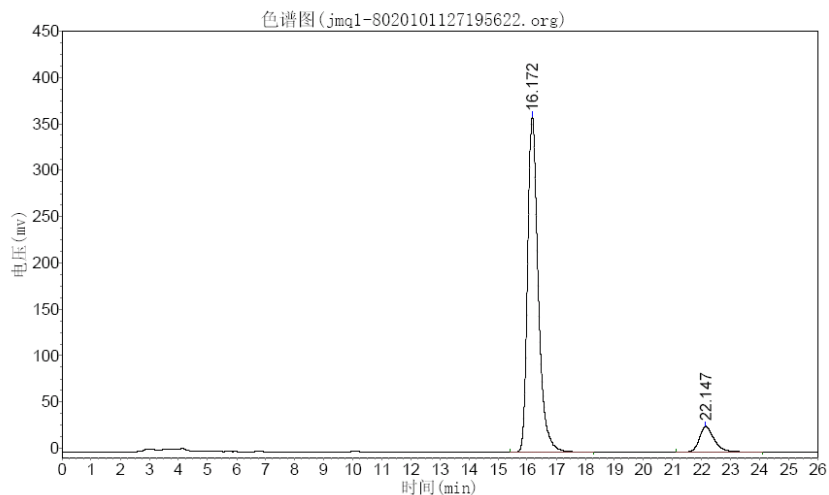

分析结果表

| 峰号 | 峰名 | 保留时间   | 峰高         | 峰面积          | 含量       |
|----|----|--------|------------|--------------|----------|
| 1  |    | 16.172 | 362048.375 | 9109131.000  | 90.4294  |
| 2  |    | 22.147 | 27882.139  | 964066.500   | 9.5706   |
| 总计 |    |        | 389930.514 | 10073197.500 | 100.0000 |

实验时间: 2010-11-27, 20:56:10  
谱图文件: D:\date\jmq\jmq1-80rac20101127202411.org

实验者: jmq  
报告时间: 2010-11-27, 20:59:20

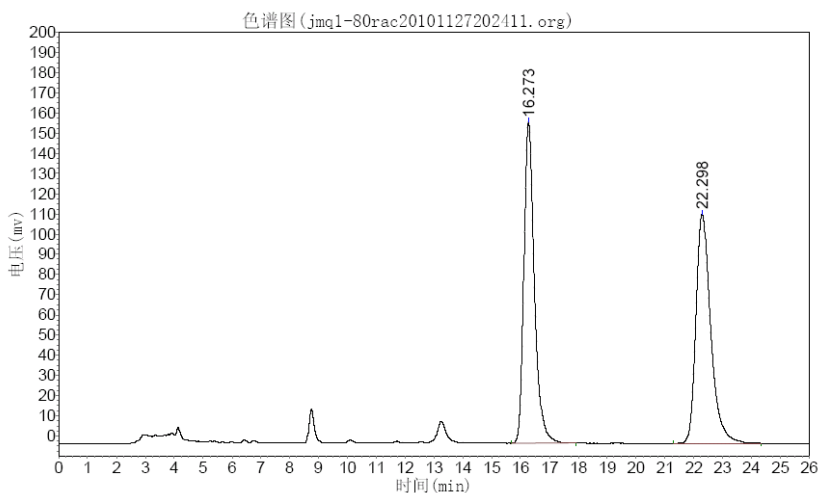

分析结果表

| 峰号 | 峰名 | 保留时间   | 峰高         | 峰面积         | 含量       |
|----|----|--------|------------|-------------|----------|
| 1  |    | 16.273 | 159079.484 | 4022908.500 | 50.0170  |
| 2  |    | 22.298 | 113539.344 | 4020169.000 | 49.9830  |
| 总计 |    |        | 272618.828 | 8043077.500 | 100.0000 |

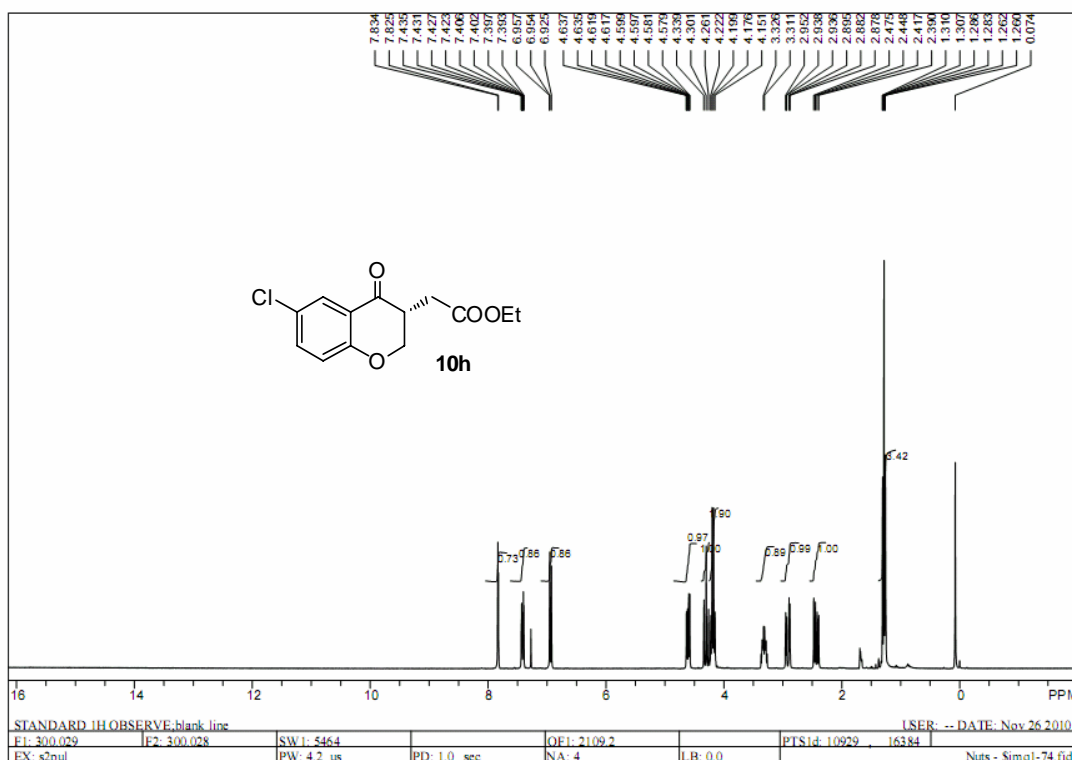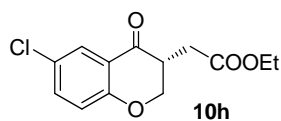

实验时间: 2010-11-25, 0:01:02  
 谱图文件: D:\date\jmq\jmq1-7420101124233118.org

实验者: jmq  
 报告时间: 2011-01-03, 23:27:08

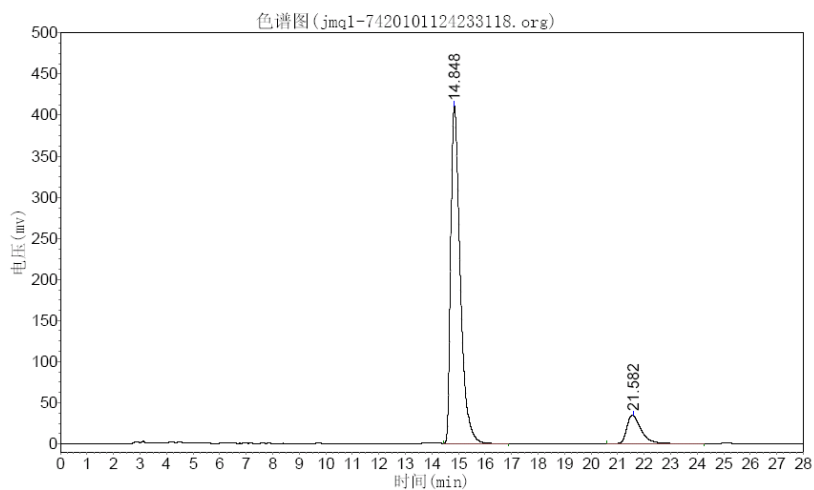

分析结果表

| 峰号 | 峰名 | 保留时间   | 峰高         | 峰面积          | 含量       |
|----|----|--------|------------|--------------|----------|
| 1  |    | 14.848 | 410191.906 | 10131754.000 | 89.0507  |
| 2  |    | 21.582 | 34130.727  | 1245761.250  | 10.9493  |
| 总计 |    |        | 444322.633 | 11377515.250 | 100.0000 |

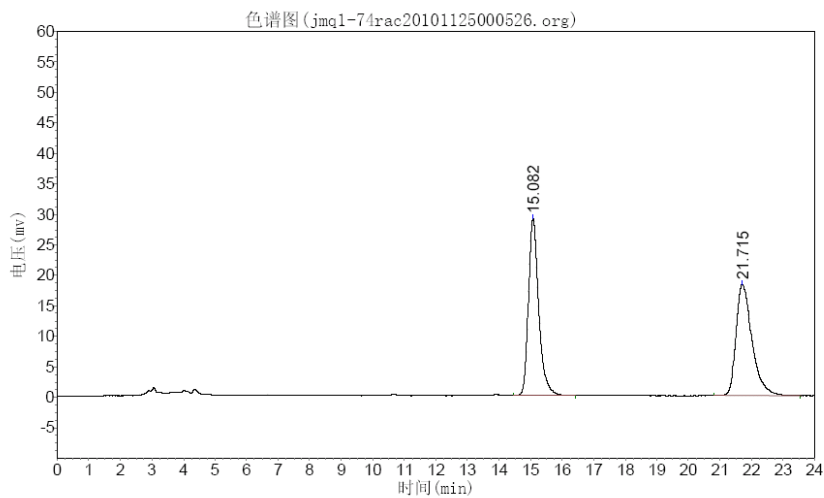

分析结果表

| 峰号 | 峰名 | 保留时间   | 峰高        | 峰面积         | 含量       |
|----|----|--------|-----------|-------------|----------|
| 1  |    | 15.082 | 29080.645 | 657919.625  | 50.4974  |
| 2  |    | 21.715 | 18232.197 | 644958.813  | 49.5026  |
| 总计 |    |        | 47312.842 | 1302878.438 | 100.0000 |

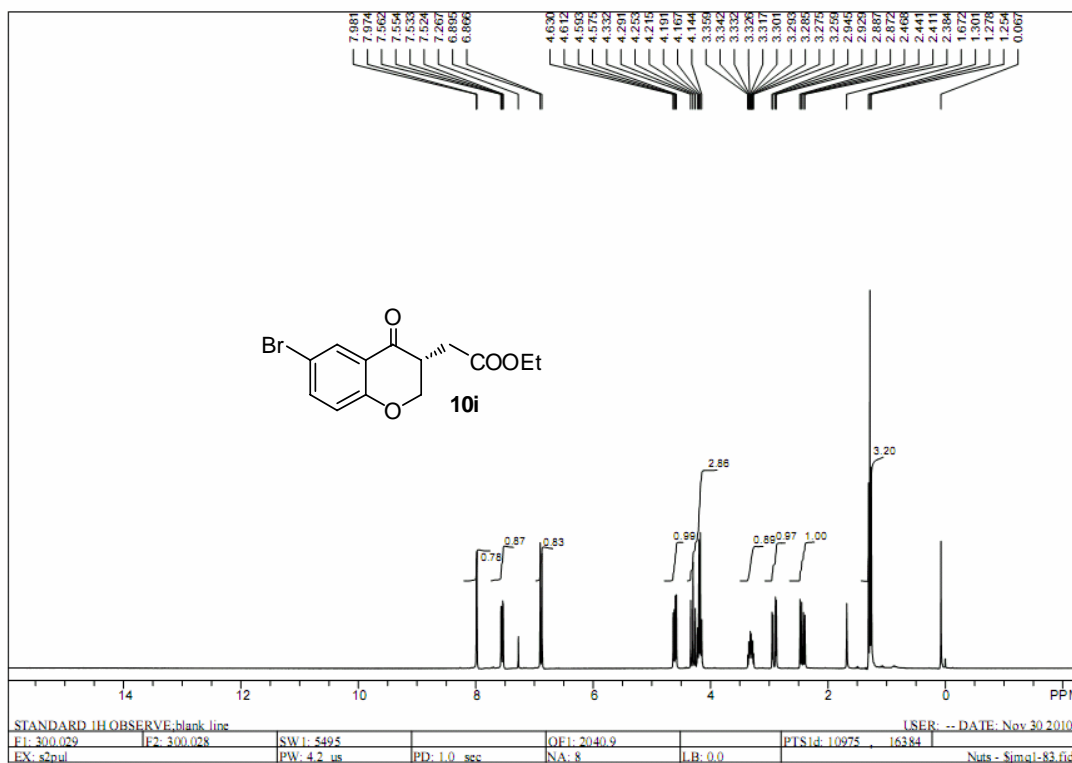



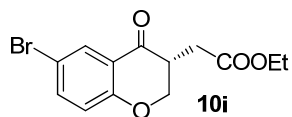

实验时间: 2010-12-4, 12:40:49  
谱图文件: D:\date\jmq\jmq1-8920101204120302.org

实验者: jmq  
报告时间: 2010-12-4, 12:47:48

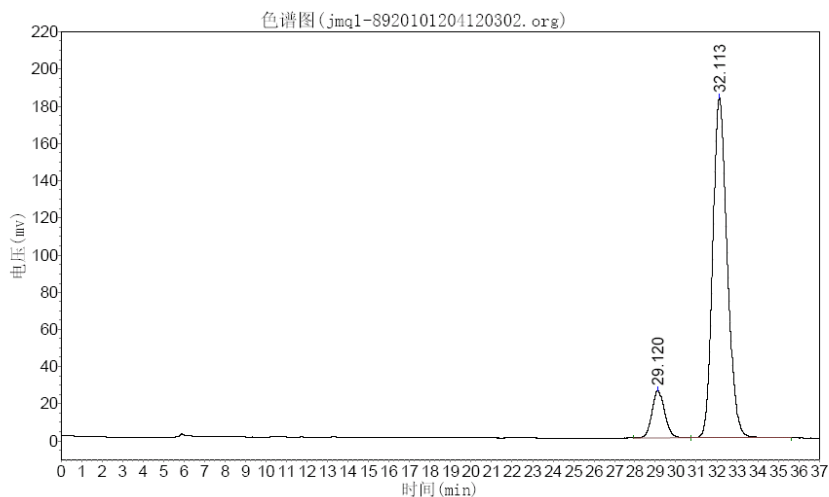

分析结果表

| 峰号 | 峰名 | 保留时间   | 峰高         | 峰面积          | 含量       |
|----|----|--------|------------|--------------|----------|
| 1  |    | 29.120 | 25340.496  | 1105027.375  | 10.9518  |
| 2  |    | 32.113 | 182760.219 | 8984932.000  | 89.0482  |
| 总计 |    |        | 208100.715 | 10089959.375 | 100.0000 |

实验时间: 2010-12-04, 13:20:16  
谱图文件: D:\date\jmq\jmq1-89rac20101204124200.org

实验者: jmq  
报告时间: 2010-12-04, 13:23:59

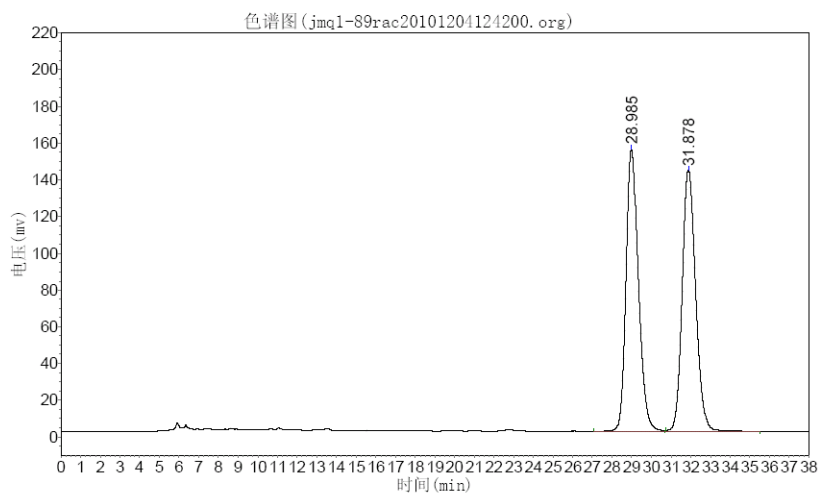

分析结果表

| 峰号 | 峰名 | 保留时间   | 峰高         | 峰面积          | 含量       |
|----|----|--------|------------|--------------|----------|
| 1  |    | 28.985 | 153544.859 | 6703626.500  | 49.9836  |
| 2  |    | 31.878 | 141922.813 | 6708016.000  | 50.0164  |
| 总计 |    |        | 295467.672 | 13411642.500 | 100.0000 |

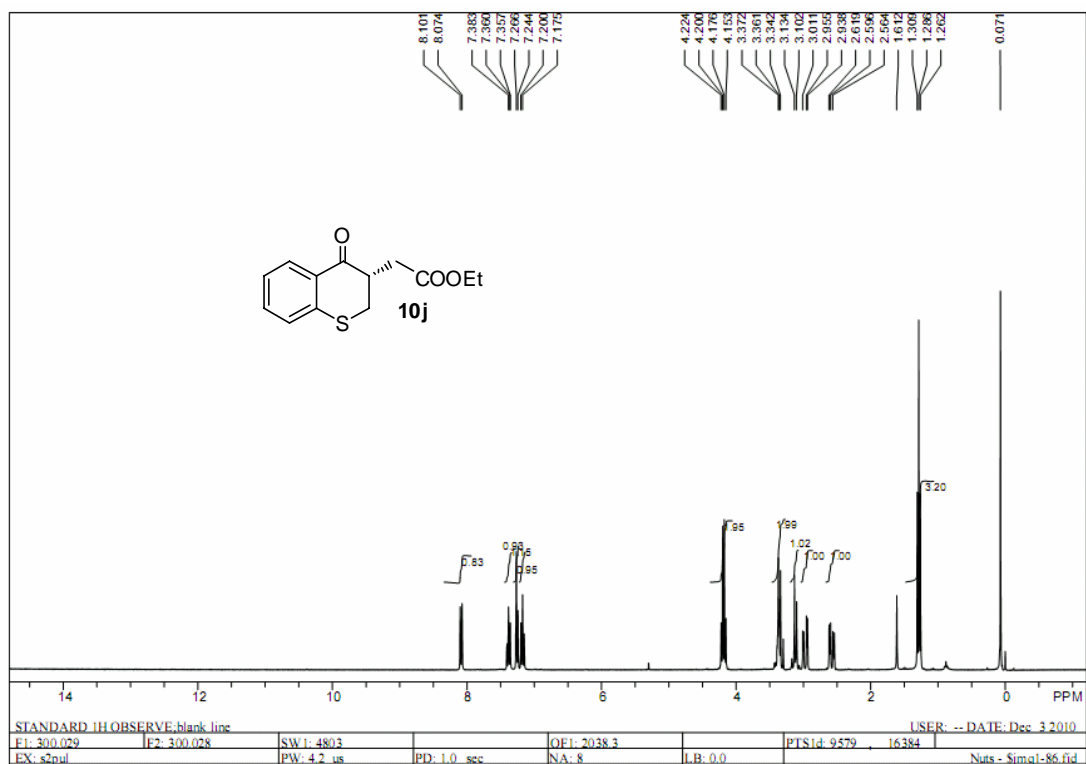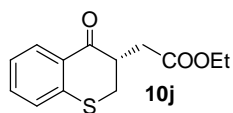

实验时间: 2010-12-02, 22:39:25  
 谱图文件: D:\date\jmq\jmq1-8620101202220720.org

实验者: jmq  
 报告时间: 2010-12-02, 22:42:55

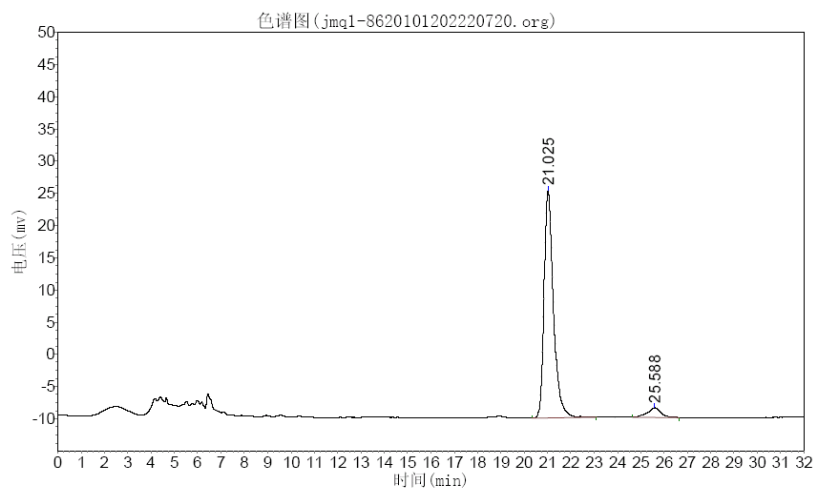

分析结果表

| 峰号 | 峰名 | 保留时间   | 峰高        | 峰面积         | 含量       |
|----|----|--------|-----------|-------------|----------|
| 1  |    | 21.025 | 35291.648 | 988533.813  | 94.3072  |
| 2  |    | 25.588 | 1518.530  | 59672.734   | 5.6928   |
| 总计 |    |        | 36810.178 | 1048206.547 | 100.0000 |

实验时间: 2010-12-2, 20:29:03  
谱图文件: D:\date\jmq\jmq1-86rac20101202195015.org

实验者: jmq  
报告时间: 2010-12-2, 22:44:54

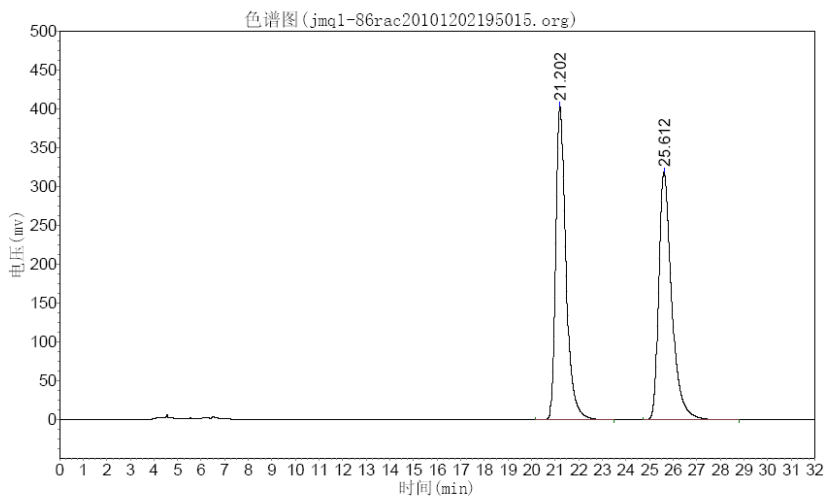

分析结果表

| 峰号 | 峰名 | 保留时间   | 峰高         | 峰面积          | 含量       |
|----|----|--------|------------|--------------|----------|
| 1  |    | 21.202 | 403654.688 | 12132979.000 | 49.9236  |
| 2  |    | 25.612 | 319292.219 | 12170135.000 | 50.0764  |
| 总计 |    |        | 722946.906 | 24303114.000 | 100.0000 |

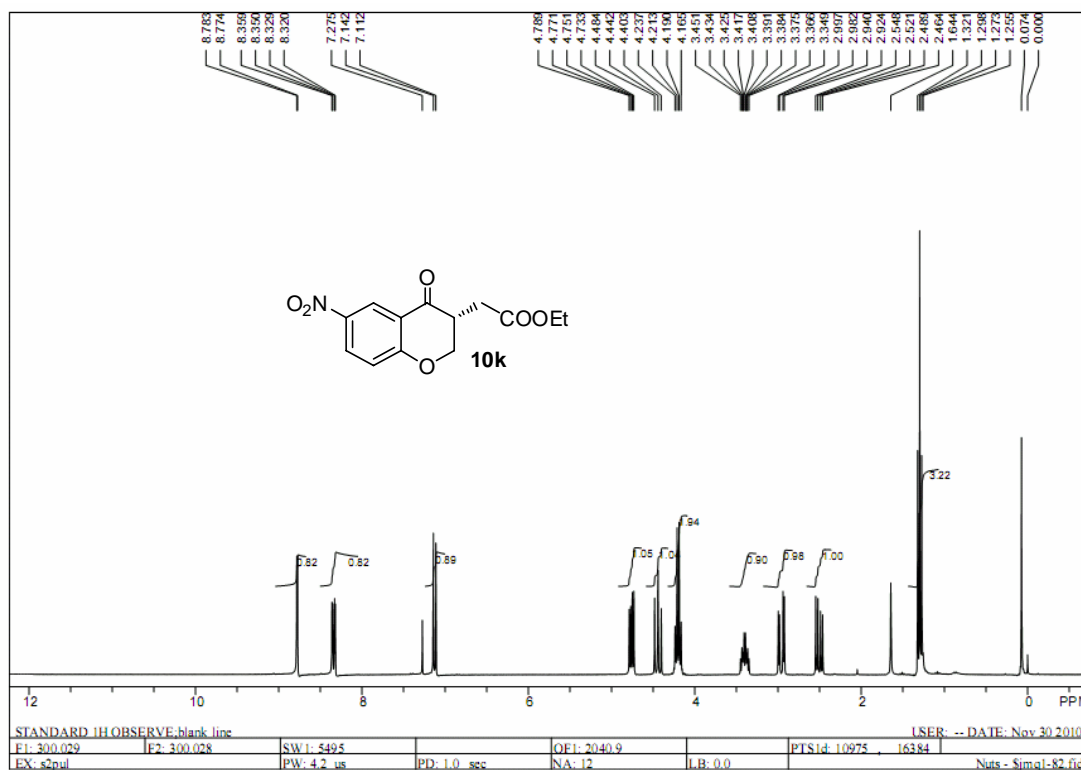

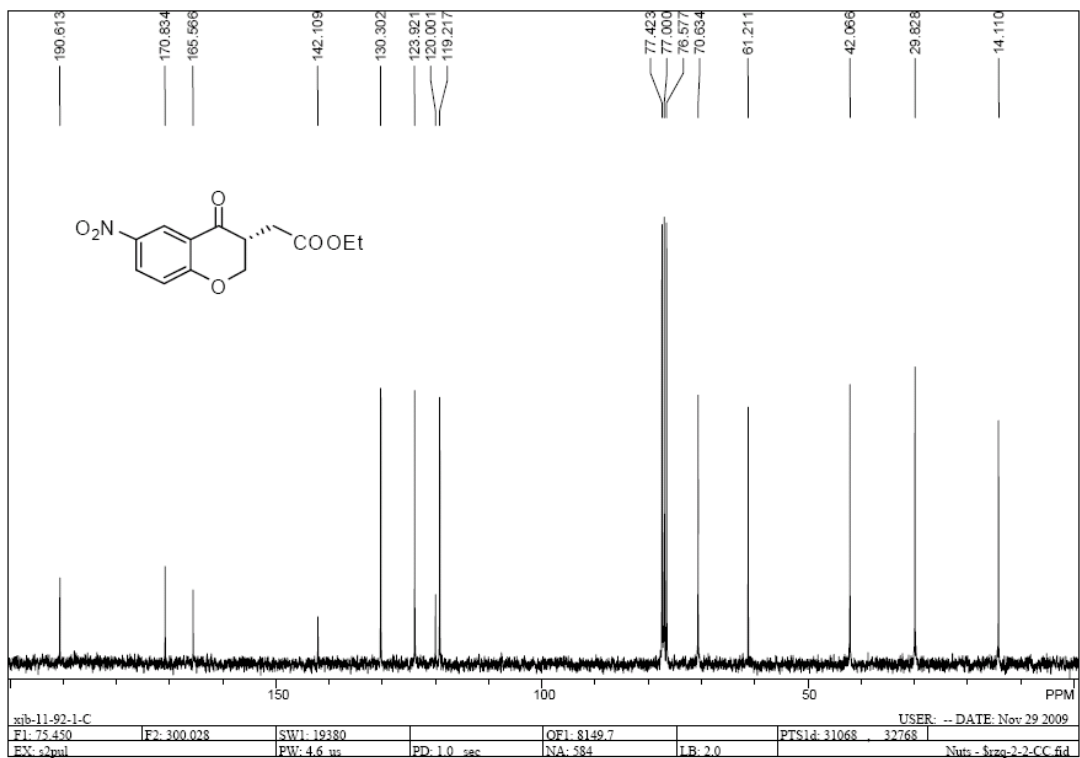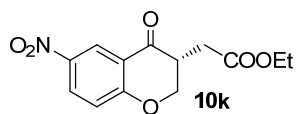

实验时间: 2010-11-30, 23:00:07  
 谱图文件: D:\date\jmq\jmq1-8220101130222443.org

实验者: jmq  
 报告时间: 2010-12-5, 18:28:37

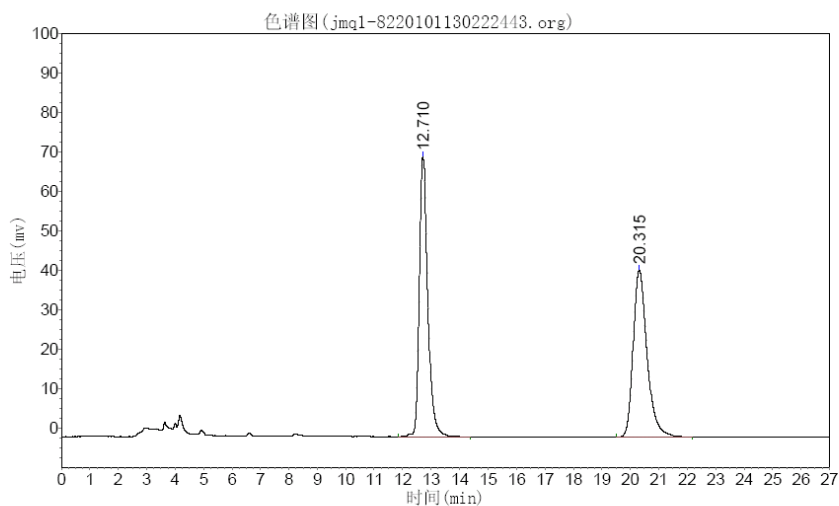

分析结果表

| 峰号 | 峰名 | 保留时间   | 峰高         | 峰面积         | 含量       |
|----|----|--------|------------|-------------|----------|
| 1  |    | 12.710 | 71117.141  | 1473330.375 | 50.7944  |
| 2  |    | 20.315 | 42378.586  | 1427246.750 | 49.2056  |
| 总计 |    |        | 113495.727 | 2900577.125 | 100.0000 |

实验时间: 2010-11-30, 22:16:38  
谱图文件: D:\date\jmq\jmq1-82rac20101130215022.org

实验者: jmq  
报告时间: 2010-11-30, 23:04:47

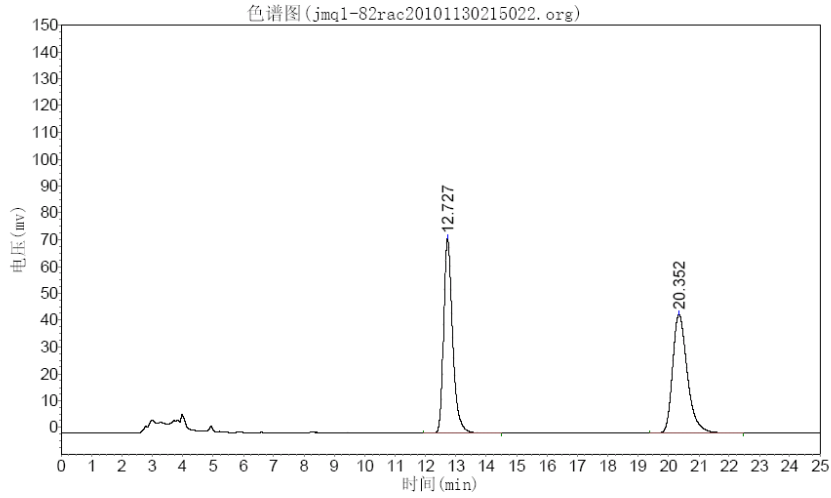

分析结果表

| 峰号 | 峰名 | 保留时间   | 峰高         | 峰面积         | 含量       |
|----|----|--------|------------|-------------|----------|
| 1  |    | 12.727 | 72572.391  | 1495748.250 | 50.0605  |
| 2  |    | 20.352 | 44116.188  | 1492132.875 | 49.9395  |
| 总计 |    |        | 116688.578 | 2987881.125 | 100.0000 |

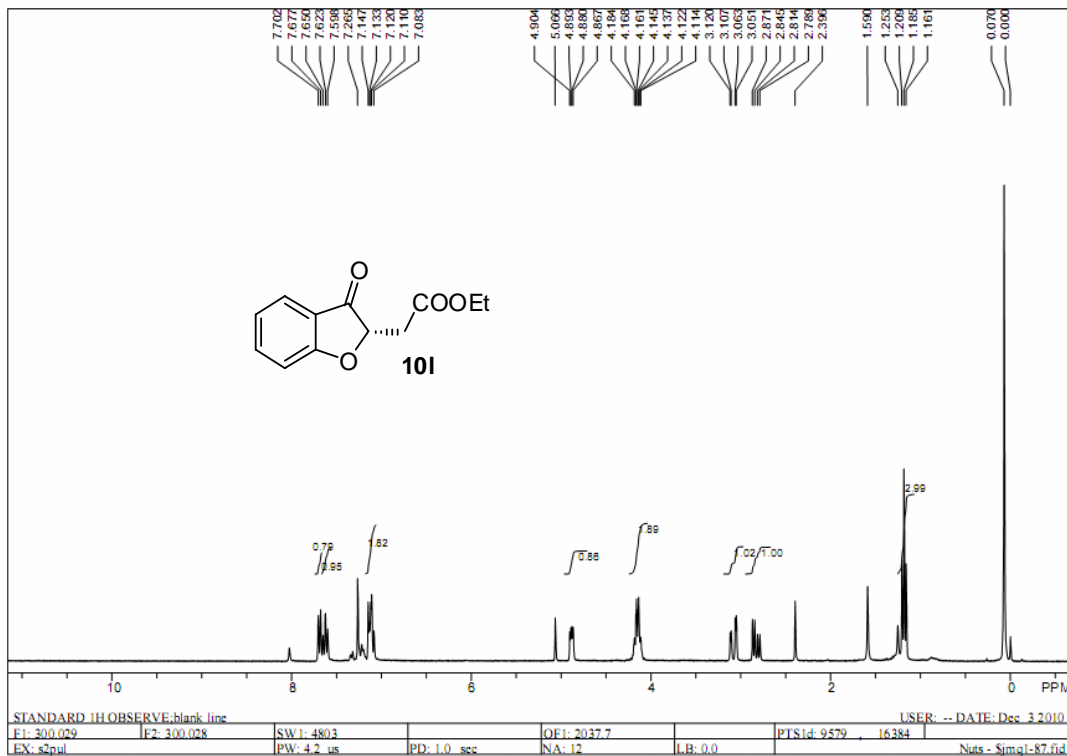

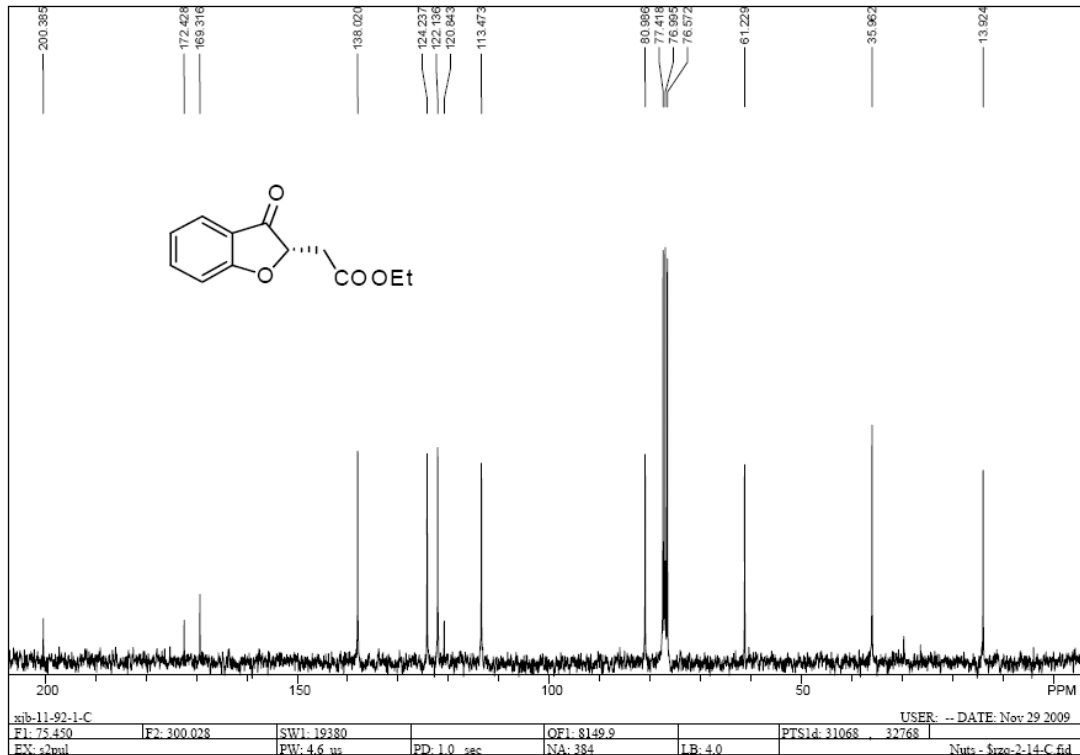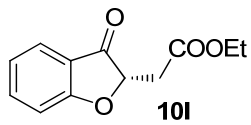

实验时间: 2010-12-4, 10:37:45  
谱图文件: D:\date\jmq\jmq1-8720101204094738.org

实验者: jmq  
报告时间: 2010-12-4, 12:24:50

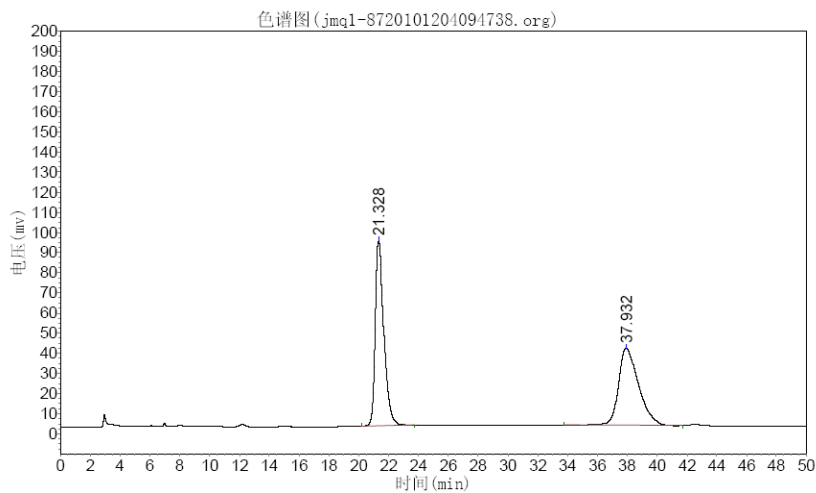

分析结果表

| 峰号 | 峰名 | 保留时间   | 峰高         | 峰面积         | 含量       |
|----|----|--------|------------|-------------|----------|
| 1  |    | 21.328 | 92007.492  | 3675771.250 | 50.7610  |
| 2  |    | 37.932 | 38220.797  | 3565559.500 | 49.2390  |
| 总计 |    |        | 130228.289 | 7241330.750 | 100.0000 |

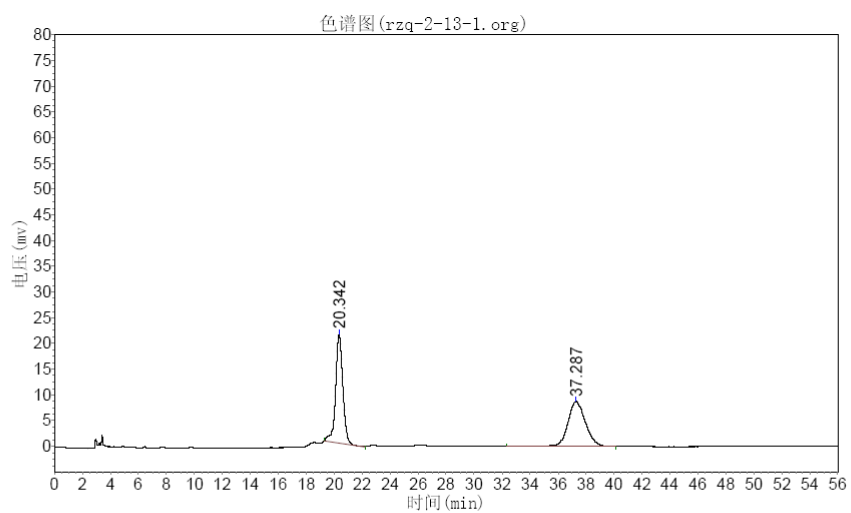

分析结果表

| 峰号 | 峰名 | 保留时间   | 峰高        | 峰面积         | 含量       |
|----|----|--------|-----------|-------------|----------|
| 1  |    | 20.342 | 21179.414 | 771577.500  | 49.9817  |
| 2  |    | 37.287 | 8756.937  | 772141.625  | 50.0183  |
| 总计 |    |        | 29936.351 | 1543719.125 | 100.0000 |
